# Supplementary material
Source: publisher figshare collection journal article supplement (https://gsapubs.figshare.com/articles/dataset/_/18863981)
Supplement: Supplementary file 1 [file 33669644]

# GSA Data Repository

## Tibetan Plateau growth linked to crustal thermal transitions since the Miocene

Xiu-Zheng Zhang<sup>1,2</sup> Qiang Wang<sup>1,2\*</sup> Derek Wyman<sup>3</sup> Quan Ou<sup>1,4</sup> Yue Qi<sup>1,2</sup> Guo-Ning Gou<sup>1</sup> Wei Dan<sup>1,2</sup> Ya-Nan Yang<sup>1,2</sup>

<sup>1</sup> *State Key Laboratory of Isotope Geochemistry, Guangzhou Institute of Geochemistry, Chinese Academy of Sciences, Guangzhou, 510640, P. R. China*

<sup>2</sup> *CAS Center for Excellence in Deep Earth Science, Guangzhou, 510640, China*

<sup>3</sup> *School of Geosciences, The University of Sydney, NSW 2006, Australia*

<sup>4</sup> *State Key Laboratory of Oil and Gas Reservoir Geology and Exploitation, Institute of Sedimentary Geology, Chengdu University of Technology, Chengdu 610059, China*

**Corresponding Author:** \* Qiang Wang, E-mail: [wqiang@gig.ac.cn](mailto:wqiang@gig.ac.cn)

### Includes the following Materials

- [Summary of samples and analysis used in this study](#)
- [Text S1](#) Analytical methods
- [Figure S1](#) Field photographs and photomicrographs of the granulite xenoliths
- [Figure S2](#) Photomicrograph of amphibolite facies xenoliths.
- [Figure S3](#) U–Pb concordia diagrams for the zircon xenocrysts
- [Figure S4](#) REE patterns of zircon from granulite xenoliths.
- [Figure S5](#) Diagram showing the amounts of melt formed from fluid-absent reactions in mafic rocks.
- [Table S1](#) SIMS zircon U-Pb and O isotopic results of crustal xenoliths
- [Table S2](#) LA-ICP-MS U-Pb isotopic and SIMS O isotopic data of zircon xenocrysts.
- [Table S3](#) In-situ LA-ICP-MS zircon trace element of granulite xenoliths
- [Table S4](#) Representative analyses of minerals of granulite xenoliths.
- [Table S5](#) Representative analyses of minerals of amphibolite facies xenoliths.

➤ **Summary of samples and analysis used in this study**

| Type                                | Sample                              | GPS Position                     | Host rock                 | Analysis                                                                                                                                                               |
|-------------------------------------|-------------------------------------|----------------------------------|---------------------------|------------------------------------------------------------------------------------------------------------------------------------------------------------------------|
| <b>Granulite xenoliths</b>          | 11WL61-7                            | N: 34°33'21";<br>E: 90°32'6"     | 3.8 Ma trachytes          | SIMS Zircon U-Pb age<br>SIMS Zircon O isotope<br>Zircon trace elements (ICP-SF-MS)<br>Mineral Chemistry (EPMA)<br>Whole-rock major elements (XRF)<br>Phase Equilibrium |
|                                     | 11WL61-2                            | N: 34°32'28";<br>E: 90°32'24"    |                           | SIMS Zircon U-Pb age<br>SIMS Zircon O isotope<br>Zircon trace elements (ICP-SF-MS)<br>Mineral Chemistry (EPMA)                                                         |
| <b>Granitic xenolith</b>            | 11WL61-1-2                          | N: 34°33'21";<br>E: 90°32'6"     |                           | SIMS Zircon U-Pb age<br>SIMS Zircon O isotope                                                                                                                          |
| <b>Amphibolite facies xenoliths</b> | 11GM01-20<br>11GM01-10<br>11GM01-21 | N: 35°01'34"<br>E: 92°40'46"     | 28 Ma syenites porphyries | Petrography<br>Mineral Chemistry (EPMA)<br>P-T Calculation                                                                                                             |
| <b>Zircon xenocrysts</b>            | 5123-2                              | N: 34°25'32";<br>E: 89°7'39"     | 2.3Ma dacite              | SIMS Zircon U-Pb age<br>SIMS Zircon O isotope                                                                                                                          |
| <b>Zircon xenocrysts</b>            | 13SW16-1                            | N: 33°46'15"<br>E: 90°15'14"     | ~6 Ma trachydacites       | LA-ICP-MS Zircon U-Pb age<br>SIMS Zircon O isotope                                                                                                                     |
|                                     | 13SW20-1                            | N: 33°45'22"<br>E: 90°20'16"     |                           |                                                                                                                                                                        |
|                                     | 13SW02-1                            | N: 33°51'32"<br>E: 90°21'59"     |                           |                                                                                                                                                                        |
|                                     | 13SW47-1                            | N: 33°46'06"<br>E: 90°15'13"     |                           |                                                                                                                                                                        |
|                                     | 13SW49-1                            | N: 33°39'33"<br>E: 90°18'32"     |                           |                                                                                                                                                                        |
|                                     | 14QW326-2                           | N: 33°49'32.5"<br>E: 90°39'07.5" |                           |                                                                                                                                                                        |
|                                     | 14QW328-3                           | N: 33°48'43.8"<br>E: 90°33'55.1" |                           |                                                                                                                                                                        |

31 **Text S1. Analytical methods**

32 **1. Phase Equilibrium**

33 P–T pseudosection has been calculated for the granulite sample 11WL61-7 in the  
34 NCKFMASHTO (Na<sub>2</sub>O–CaO–K<sub>2</sub>O–FeO–MgO–Al<sub>2</sub>O<sub>3</sub>–SiO<sub>2</sub>–H<sub>2</sub>O–TiO<sub>2</sub>–Fe<sub>2</sub>O<sub>3</sub>)  
35 system using the software THERMOCALC, version 3.40i (Powell and Holland, 1988)  
36 (updated February, 2012). The whole-rock composition of 11WL61-7 was analyzed  
37 on fused glass beads using a Rigaku RIX 2000 X-ray fluorescence (XRF)  
38 spectrometer at the State Key Laboratory of Isotope Geochemistry, Guangzhou  
39 Institute of Geochemistry, Chinese Academy of Sciences. Analytical uncertainties are  
40 between 1% and 5%. The input bulk composition is: SiO<sub>2</sub> = 52.23 (wt.%), Al<sub>2</sub>O<sub>3</sub> =  
41 15.93 (wt.%), TiO<sub>2</sub> = 0.83 (wt.%), Fe<sub>2</sub>O<sub>3</sub> = 8.48 (wt.%), MnO = 0.08 (wt.%), MgO =  
42 6.33 (wt.%), CaO = 8.15(wt.%), Na<sub>2</sub>O = 2.49 (wt.%), K<sub>2</sub>O = 2.05 (wt.%) and P<sub>2</sub>O<sub>5</sub> =  
43 0.20 (wt.%). These oxides were normalized in the NCKFMASHTO system by  
44 assuming that P<sub>2</sub>O<sub>5</sub> is present in apatite and the O (Fe<sub>2</sub>O<sub>3</sub>) value equals to the  
45 summation of the Fe<sup>3+</sup> content in each constituent mineral calculated by charge  
46 balance constraints (Fe<sup>3+</sup>/ (Fe<sup>2+</sup>+ Fe<sup>3+</sup>) ≈ 0.1). Except where H<sub>2</sub>O is considered as a  
47 compositional variable, the modelled bulk-rock water contents were adjusted  
48 according to Palin et al. (2016): minimal free fluid (~1 mol.%) was present at the  
49 8-kbar solidus to ensure that the solidus remained fluid-saturated over the entire P-T  
50 range of interest. The mineral activity–composition relationships are as follows:  
51 metabasite melt, clinopyroxene and amphibole (Green et al., 2016); garnet,  
52 orthopyroxene, biotite and chlorite (White et al., 2014); olivine and epidote (Holland  
53 and Powell, 2011); magnetite–spinel (White et al., 2002); ilmenite–hematite (White et  
54 al., 2000); plagioclase and K-feldspar (Holland and Powell, 2003); and  
55 muscovite–paragonite (White et al., 2014). Pure phases included quartz, rutile, titanite

56 and aqueous fluid (H<sub>2</sub>O).

57

## 58 **2. Zircon U-Pb age analysis**

59 Zircon grains were separated from fresh samples using conventional heavy liquid and  
60 magnetic techniques and then hand-picked under a binocular microscope. They were  
61 casted in the epoxy mount and polished to about half their thickness for analysis.

62 Cathodoluminescence (CL) images of zircons were conducted at State Key  
63 Laboratory of Isotope Geochemistry, Guangzhou Institute of Geochemistry, Chinese  
64 Academy of Sciences (SKLaBIG GIGCAS).

65

### 66 **2.1 SIMS**

67 Zircon U-Pb analyses were conducted using the Cameca IMS 1280HR secondary ion  
68 mass spectrometry (SIMS) with a spot size of 20×30 μm at the SKLaBIG GIGCAS.

69 Analytical procedures are similar to those described by [Li et al. \(2009\)](#). An O<sub>2</sub><sup>-</sup>  
70 primary ion beam with an intensity of ~10 nA was accelerated at -13kV. The aperture  
71 illumination mode was used with a 200 μm primary beam mass filter aperture to  
72 produce even sputtering over the entire analyzed area. The secondary ion beam optics  
73 was optimized to achieve a mass resolution of about 5400 to separate Pb<sup>+</sup> peaks from  
74 isobaric interferences. Rectangular lenses were activated to increase the transmission  
75 at high mass resolution. A single electron multiplier was used in ion-counting mode to  
76 collect secondary ions by switching the magnetic field following the peak jumping  
77 sequence: 196 (<sup>90</sup>Zr<sub>2</sub><sup>16</sup>O, matrix reference), 200 (<sup>92</sup>Zr<sub>2</sub><sup>16</sup>O), 200.5 (background),  
78 203.81 (<sup>94</sup>Zr<sub>2</sub><sup>16</sup>O, for mass calibration), 203.97 (<sup>204</sup>Pb), 206 (<sup>206</sup>Pb), 207 (<sup>207</sup>Pb), 208  
79 (<sup>208</sup>Pb), 209 (<sup>177</sup>Hf<sup>16</sup>O<sub>2</sub>), 238 (<sup>238</sup>U), 248 (<sup>232</sup>Th<sup>16</sup>O), 270 (<sup>238</sup>U<sup>16</sup>O<sub>2</sub>), and 270.1  
80 (reference mass). The integration time for these mass are 1.04, 0.56, 4.16, 0.56, 6.24,

81 4.16, 6.24, 2.08, 1.04, 2.08, 2.08, 2.08, and 0.24 s, respectively. Each measurement  
82 consisted of seven cycles, and the total analytical time per measurement was ~12  
83 minutes.

84 Zircon U–Th–Pb isotopic ratios were corrected using the standard zircon Plešovice  
85 (Sláma et al., 2008) based on a power law relationship between measured  $^{206}\text{Pb}^{+}/^{238}\text{U}^{+}$   
86 and  $^{238}\text{U}^{16}\text{O}_2^{+}/^{238}\text{U}^{+}$ . The  $^{207}\text{Pb}$ -based common lead correction was used to derive the  
87 U–Pb ages ( $\text{Age}^{207c}$  in Table S1) with a present-day crustal composition of  
88  $^{207}\text{Pb}/^{206}\text{Pb}_{\text{common}} = 0.84$  for the common Pb. A long-term uncertainty of 1.5% (1 RSD)  
89 for  $^{206}\text{Pb}/^{238}\text{U}$  measurements of the standard zircons was propagated to the unknowns  
90 (Li et al., 2010), despite that the measured  $^{206}\text{Pb}/^{238}\text{U}$  error in a specific session is  
91 generally around 1% (1 RSD) or less. Data reduction was carried out using the  
92 Isoplot/Ex v. 3.0 program (Ludwig, 2003). Uncertainties on individual analyses in the  
93 data tables are reported at a  $1\sigma$  level. Mean ages for pooled U/Pb and Pb/Pb analyses  
94 are quoted with  $2\sigma$  and/or 95% confidence intervals. In this study, we analyzed six  
95 Qinghu grains yielding a concordia age of  $160.1 \pm 2.0$  Ma, which is identical to the  
96 recommended value of  $159.5 \pm 0.2$  Ma (Li et al., 2013) within analytical uncertainties.

97

## 98 **2.1 LA-ICP-MS**

99 Zircon U–Pb dating was performed using LA-ICP-MS for zircon xenocrysts contained  
100 in ~6 Ma trachydacites at the Institute of Geology and Geophysics, Chinese Academy  
101 of Sciences (Table S2). An Agilent 7500a quadruple (Q)–ICPMS and a Neptune  
102 multi-collector (MC)–ICPMS with a 193 nm excimer ArF laser-ablation system  
103 (GeoLas Plus) were used for determination of zircon U–Pb ages. The analyses were  
104 conducted with a spot diameter of 40  $\mu\text{m}$  with a typical ablation time of

105 approximately 30 s for 200 cycles of each measurement, an 8 Hz repetition rate, and a  
106 laser power of 100mJ/pulse. Zircon 91500 was used as the standard (Wiedenbeck et  
107 al., 1995) and the standard silicate glass NIST 610 was used to optimize the machine.  
108  $^{207}\text{Pb}/^{206}\text{Pb}$  and  $^{206}\text{Pb}/^{238}\text{U}$  ratios were calculated using the GLITTER program  
109 (Jackson et al., 2004). Common Pb was corrected by ComPbCorr#3 151 (Andersen,  
110 2002) for those with common $^{206}\text{Pb} > 1\%$ . The weighted mean ages are quoted at the  
111 95% confidence level. The age calculations and concordia plots were made using  
112 Isoplot (ver 3.0) (Ludwig, 2003).

113

### 114 **3. Zircon O isotope compositions**

115 Zircon oxygen isotopes were measured using Cameca IMS 1280HR SIMS at  
116 SKLaBIG GIGCAS. The detailed analytical procedures were similar to those  
117 described by Li et al. (2009). The measured oxygen isotopic data were corrected for  
118 instrumental mass fractionation (IMF) using the Penglai zircon standard ( $\delta^{18}\text{O}_{\text{VSMOW}}$   
119 = 5.3 ‰) (Li et al., 2009). The internal precision of a single analysis generally was  
120 better than 0.2 ‰ ( $1\sigma$ ) for the  $^{18}\text{O}/^{16}\text{O}$  ratio. The external precision, measured by the  
121 reproducibility of repeated analyses of the Penglai standard, is 0.10 ‰ ( $2\sigma$ ,  $n = 24$ ).  
122 Eight measurements of the Qinghu zircon standard during the course of this study  
123 yielded a mean of  $\delta^{18}\text{O} = 5.51 \pm 0.20$  ‰ ( $2\sigma$ ), which is consistent within analytical  
124 errors with the reported value of  $5.4 \pm 0.2$  ‰ (Li et al., 2013)(Tables S1, S2).

125

### 126 **4. Zircon Trace Element**

127 *In situ* trace element for the zircon of granulite xenoliths were measured with an  
128 ELEMENT XR (Thermo Fisher Scientific) ICP-SF-MS coupled with a 193-nm (ArF)  
129 Resonetics RESolution M-50 laser ablation system in the SKLaBIG GIG CAS. Laser

130 condition was set as following: beam size, 33 $\mu$ m; repetition rate, 6Hz; energy density,  
131  $\sim$ 4 J cm<sup>-2</sup>. A smoothing device (The Squid, Laurin Technic) was used to smooth the  
132 sample signal. Each spot analysis consisted of 20 s gas blank collection with the laser  
133 off, and 30 s sample signal detection with the laser on. Si was selected as the internal  
134 standard element. NIST610 was selected as the calibration standard. The oxide  
135 molecular yield, indicated by the <sup>232</sup>Th<sup>16</sup>O/<sup>232</sup>Th ratio, was less than 0.3%. The detailed  
136 experiment procedure and data reduction strategy are described in [Zhang et al. \(2019\)](#).  
137 NIST612 was measured as unknown samples. 30 analyses of NIST612 indicate most  
138 elements are within 8% of the reference values and the analytical precision (2RSD)  
139 was better than 10% for most elements ([Table S3](#)).

140

## 141 **5. Mineral Chemistry**

142 Representative minerals in the crustal xenoliths were selected for chemical analysis by  
143 electron probe micro-analyzer (EPMA) JEOL JXA-8800 at the SKLaBIG GIG CAS.  
144 The operating conditions were 20 kV, 20 nA beam current, and 5  $\mu$ m probe diameter.  
145 Representative mineral analyses are listed in [Tables S4](#) and [S5](#). The structural  
146 formulae have been given for fixed oxygen values and with Fe<sup>3+</sup> calculated by  
147 stoichiometric charge balance.

148

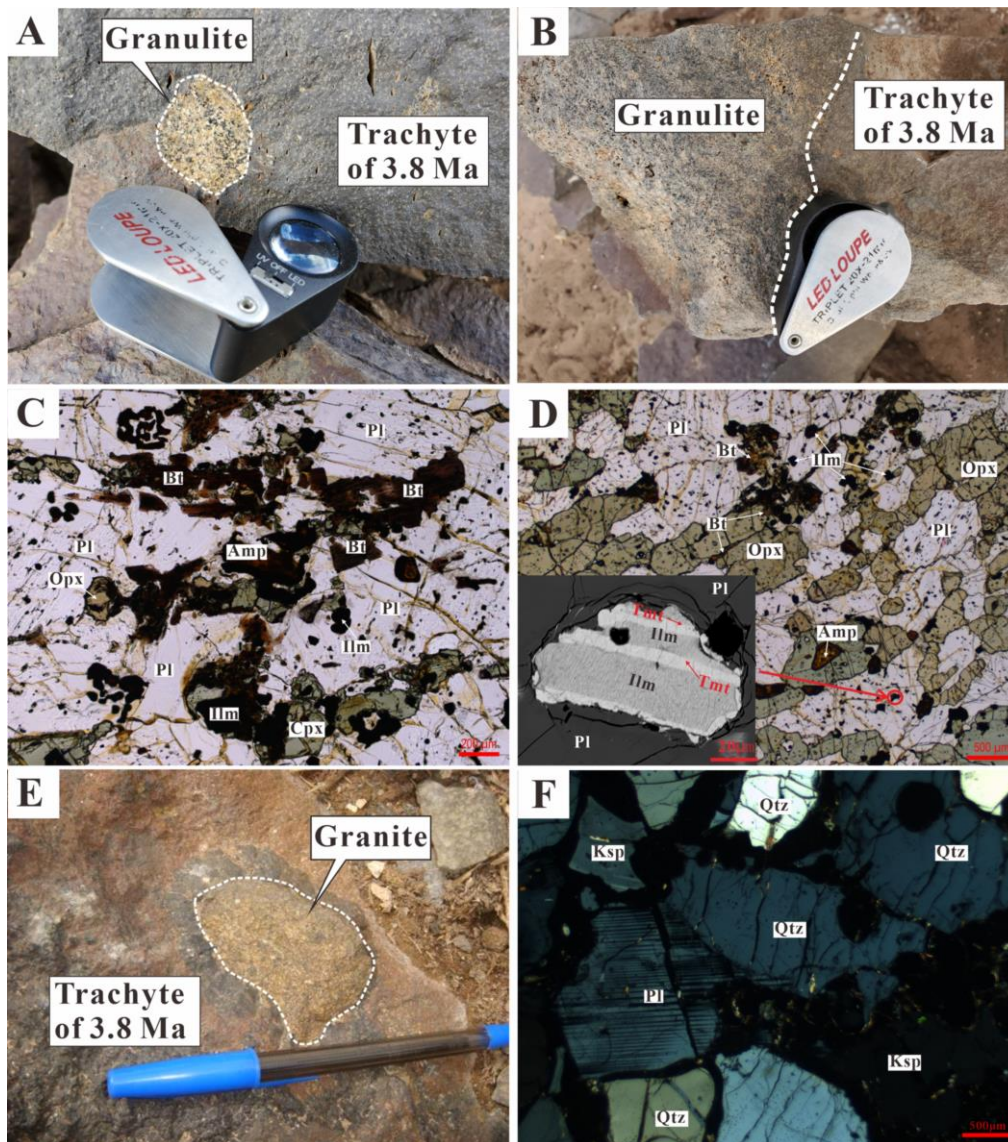

149

150 **Figure S1** Field photographs and photomicrographs of the crustal xenoliths contained

151 in 3.8 Ma trachyte, from Wulanwulahu area, central Tibet. (A-B) Field photographs

152 showing the occurrences of the granulite xenoliths. (C) Photomicrographs of mafic

153 granulite xenoliths 11WL61-2 (plane polarized light photomicrograph). (D)

154 Granulite samples 11WL61-7 exhibit foliation defined by the preferred orientation of

155 mineral grains. Minor titanomagnetite was observed to occurred as parallel lamellae

156 within ilmenite. (E-F) Field photographs and photomicrographs of the granitic

157 xenoliths. Amp = amphibole, Pl = plagioclase, Bt = biotite, Opx = orthopyroxene,

158 Cpx = clinopyroxene, Ksp = K-feldspar, Qtz = quartz, Ilm = ilmenite, Tmt =

159 titanomagnetite



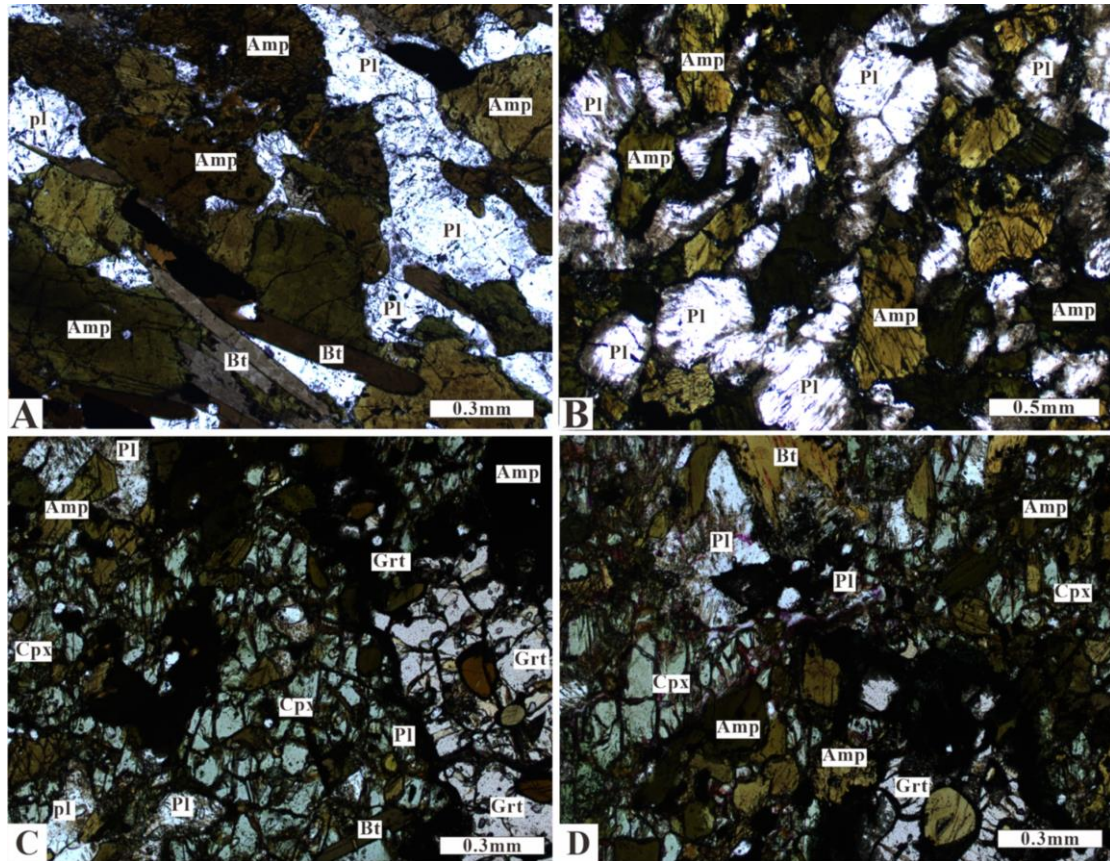

160

161 **Figure S2** Photomicrograph (plane polarized light) showing the mineral textures and  
 162 mineral assemblage of crustal xenoliths contained in 28 Ma syenites porphyries. (A-B)  
 163 amphibolite (C-D) garnet amphibolite. These xenoliths have medium-grained  
 164 polygonal granoblastic texture with the assemblages of amphibole (35–50 vol. %) +  
 165 plagioclase (35–40 vol. %) + biotite (5–10 vol. %) + quartz (5–7 vol. %) + ilmenite  
 166 (0–5 vol. %) + garnet (0–8 vol. %) + clinopyroxene (0–7 vol. %). Compared with the  
 167 water-poor granulite xenoliths, these amphibolite facies crustal xenoliths are rich in  
 168 hydrous minerals (e.g., biotite and amphibole), up to 40–60 vol. %. Amp = amphibole,  
 169 Pl = plagioclase, Bt = biotite, Grt = garnet, Cpx = clinopyroxene.

170

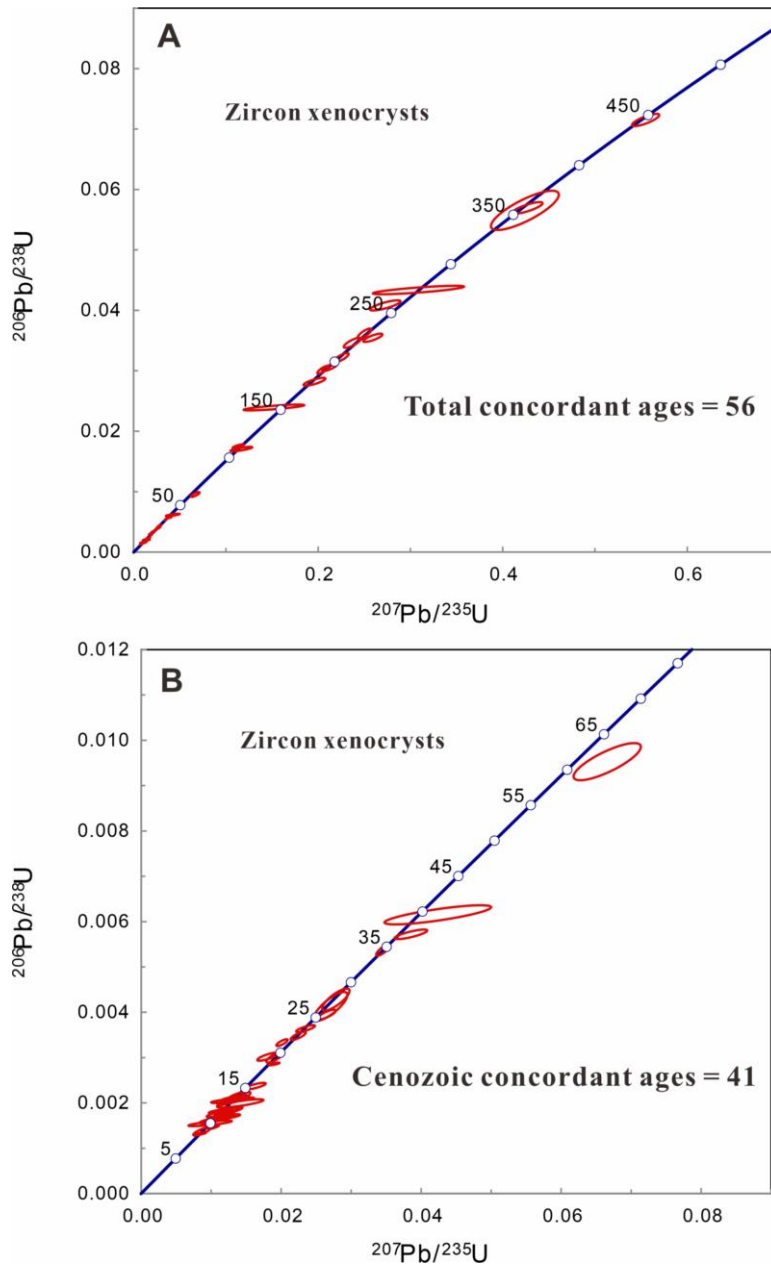

171

172 **Figure S3** U–Pb concordia diagrams for the zircon xenocrysts from 6–2.3 Ma lavas.

173 Eight samples displayed clear oscillatory zoning of magmatic origin and yielded 56

174 concordant U–Pb ages (from 81 analyses) of 445–8.5 Ma (Tables S2), with most (41

175 analyses, 73%) being of Cenozoic age.

176

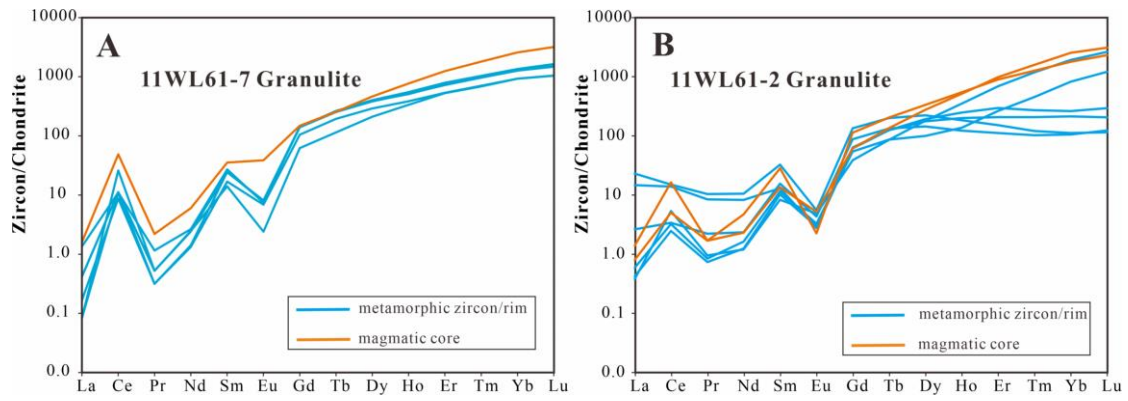

177

178 **Figure S4** Chondrite normalised REE patterns of zircon cores and metamorphic  
 179 overgrowths from granulite xenoliths contained in 3.8 Ma trachyte. Chondrite values  
 180 are from [Sun and McDonough \(1989\)](#).

181

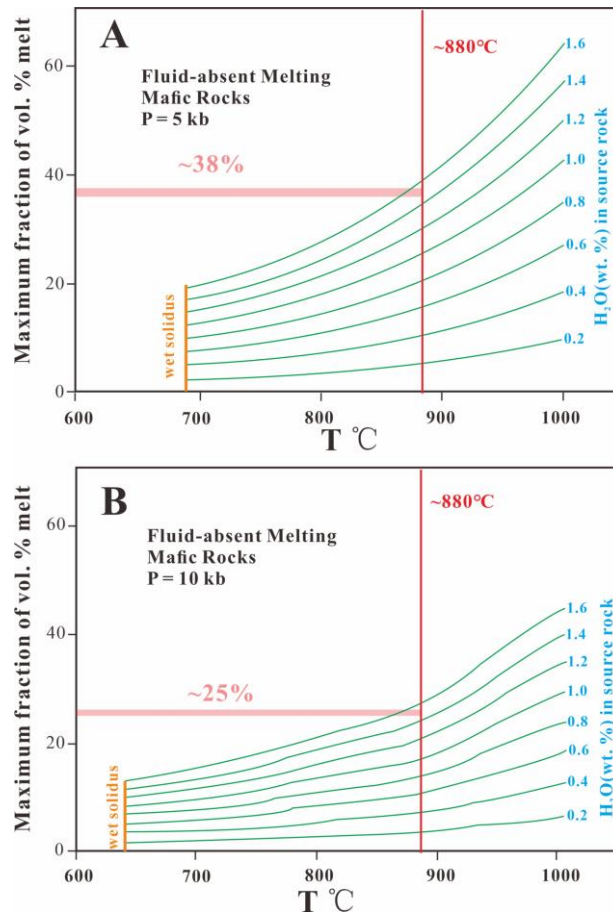

182

183 **Figure S5** Diagram showing the amounts of melt formed from fluid-absent reactions  
 184 in mafic rocks at (A) 5 kbar and (B) 10 kbar as a function of temperature and water  
 185 content of the source rock (Clemens et al., 1987). These diagrams can be used to  
 186 estimate roughly the amount of melt produced during the thermal transition from the  
 187 amphibolite-facies crust of 28 Ma to the granulite-facies crust of 22.6–12.9 Ma. The  
 188 original H<sub>2</sub>O-rich middle crust (~1.5 wt.% H<sub>2</sub>O) at 28 Ma could produce as much as  
 189 25–38 vol. % melts during 22.6–12.9 Ma when the temperature rose to 880°C, which  
 190 is consistent with the results of phase equilibrium (Figs. 2D). The H<sub>2</sub>O contents (~1.5  
 191 wt.%) are calculated based the mineral assemblages (vol. %, Amp<sub>40</sub>Pl<sub>35</sub>Bt<sub>10</sub>Cpx<sub>8</sub>Grt<sub>7</sub>)  
 192 and mineral properties (see blow, Hacker et al. 2004).

|                              | Pl  | Grt  | Cpx  | Amp  | Bt   |
|------------------------------|-----|------|------|------|------|
| Density (g/cm <sup>3</sup> ) | 2.7 | 4.31 | 3.26 | 3.24 | 2.79 |
| H <sub>2</sub> O (wt.%)      | 0   | 0    | 0    | 2.5  | 4.5  |

**Table S1** SIMS zircon U-Pb and O isotopic results of crustal xenoliths entrained in 3.8 Ma trachytes.

| Spot #                               | Properties  | U<br>(ppm) | Th<br>(ppm) | Pb<br>(ppm) | Th<br>U | $\frac{^{238}\text{U}}{^{206}\text{Pb}}$ | $\pm 1\sigma$<br>(%) | $\frac{^{207}\text{Pb}}{^{206}\text{Pb}}$ | $\pm 1\sigma$<br>(%) | Age <sup>207c</sup><br>(Ma) | $\pm 1\sigma$ | $\delta^{18}\text{O}$ | $1\sigma$ |
|--------------------------------------|-------------|------------|-------------|-------------|---------|------------------------------------------|----------------------|-------------------------------------------|----------------------|-----------------------------|---------------|-----------------------|-----------|
| <b>11WL61-7: granulite xenolith</b>  |             |            |             |             |         |                                          |                      |                                           |                      |                             |               |                       |           |
| 1                                    | metamorphic | 698        | 90.6        | 2.39        | 0.13    | 320.88                                   | 1.64                 | 0.04832                                   | 2.83                 | 20.0                        | 0.3           | 12.16                 | 0.09      |
| 2                                    | metamorphic | 494        | 52.6        | 1.89        | 0.11    | 280.47                                   | 2.13                 | 0.04959                                   | 2.28                 | 22.9                        | 0.5           | 12.52                 | 0.12      |
| 3                                    | metamorphic | 793        | 129         | 2.93        | 0.16    | 283.11                                   | 2.44                 | 0.06150                                   | 2.13                 | 22.3                        | 0.5           | 12.18                 | 0.11      |
| 4                                    | metamorphic | 2039       | 107         | 7.69        | 0.05    | 280.43                                   | 1.99                 | 0.04629                                   | 1.30                 | 23.0                        | 0.5           | 12.64                 | 0.13      |
| 5                                    | metamorphic | 723        | 101         | 2.64        | 0.14    | 300.94                                   | 2.54                 | 0.04884                                   | 2.51                 | 21.3                        | 0.5           | 12.25                 | 0.14      |
| 6                                    | metamorphic | 704        | 72.2        | 2.36        | 0.10    | 319.88                                   | 1.92                 | 0.05082                                   | 3.82                 | 20.0                        | 0.4           | 11.84                 | 0.09      |
| 7                                    | core        | 938        | 1058        | 52.5        | 1.13    | 25.30                                    | 1.53                 | 0.05317                                   | 0.60                 | 249.2                       | 3.8           | 5.94                  | 0.12      |
| 8                                    | rim         | 814        | 129         | 2.0         | 0.16    | 267.24                                   | 2.71                 | 0.16676                                   | 5.05                 | 20.4                        | 0.6           | 12.26                 | 0.11      |
| <b>11WL61-2: granulite xenolith</b>  |             |            |             |             |         |                                          |                      |                                           |                      |                             |               |                       |           |
| 1                                    | rim         | 2420       | 45.8        | 6.57        | 0.02    | 380.46                                   | 1.53                 | 0.05253                                   | 1.63                 | 16.8                        | 0.3           | 9.88                  | 0.11      |
| 2                                    | rim         | 2749       | 47.0        | 5.0         | 0.02    | 490.62                                   | 1.68                 | 0.05141                                   | 1.75                 | 13.0                        | 0.2           | 10.15                 | 0.11      |
| 3                                    | rim         | 2906       | 61.6        | 7.0         | 0.02    | 401.68                                   | 1.62                 | 0.04950                                   | 2.33                 | 16.0                        | 0.3           | 10.15                 | 0.12      |
| 4                                    | rim         | 3057       | 67.3        | 8.07        | 0.02    | 394.58                                   | 1.61                 | 0.04996                                   | 2.37                 | 16.2                        | 0.3           | 10.06                 | 0.11      |
| 5                                    | core        | 403        | 315         | 15.3        | 0.78    | 32.98                                    | 1.63                 | 0.05182                                   | 1.39                 | 192.1                       | 3.1           | 6.07                  | 0.15      |
| 6                                    | core        | 415        | 76.8        | 54.0        | 0.18    | 8.66                                     | 1.52                 | 0.06531                                   | 0.50                 | 702.6                       | 10.4          | 5.23                  | 0.12      |
| 7                                    | rim         | 1455       | 60.6        | 4.30        | 0.04    | 368.28                                   | 1.73                 | 0.05285                                   | 1.48                 | 17.3                        | 0.3           | 10.53                 | 0.13      |
| 8                                    | metamorphic | 2264       | 37.7        | 4.79        | 0.02    | 494.79                                   | 1.57                 | 0.04814                                   | 1.67                 | 13.0                        | 0.2           | 9.69                  | 0.08      |
| 9                                    | metamorphic | 1916       | 21.0        | 3.98        | 0.01    | 502.51                                   | 1.62                 | 0.05199                                   | 1.51                 | 12.7                        | 0.2           | 10.36                 | 0.15      |
| <b>11WL61-1-2: granitic xenolith</b> |             |            |             |             |         |                                          |                      |                                           |                      |                             |               |                       |           |
| 1                                    | magmatic    | 22930      | 1501        | 37          | 0.07    | 666.17                                   | 2.97                 | 0.04748                                   | 0.46                 | 9.65                        | 0.29          | 9.16                  | 0.15      |
| 2                                    | magmatic    | 5284       | 383         | 8           | 0.07    | 684.71                                   | 2.45                 | 0.04935                                   | 1.06                 | 9.37                        | 0.23          | 9.39                  | 0.23      |
| 3                                    | magmatic    | 2906       | 111         | 4           | 0.04    | 693.70                                   | 1.51                 | 0.04698                                   | 2.24                 | 9.28                        | 0.14          | 9.23                  | 0.23      |
| 4                                    | magmatic    | 7364       | 375         | 11          | 0.05    | 718.34                                   | 2.39                 | 0.04790                                   | 1.10                 | 8.95                        | 0.21          | 9.23                  | 0.19      |
| 5                                    | magmatic    | 6439       | 403         | 10          | 0.06    | 683.77                                   | 1.50                 | 0.04807                                   | 1.37                 | 9.40                        | 0.14          | 9.23                  | 0.11      |
| 6                                    | magmatic    | 5535       | 175         | 9           | 0.03    | 671.01                                   | 2.35                 | 0.05010                                   | 1.03                 | 9.55                        | 0.22          | 9.29                  | 0.12      |
| 7                                    | magmatic    | 10670      | 966         | 16          | 0.09    | 712.34                                   | 1.59                 | 0.04900                                   | 0.74                 | 9.01                        | 0.14          | 9.62                  | 0.14      |
| 8                                    | magmatic    | 4661       | 129         | 6           | 0.03    | 783.48                                   | 1.50                 | 0.04765                                   | 1.18                 | 8.21                        | 0.12          | 9.23                  | 0.16      |
| 9                                    | magmatic    | 5517       | 158         | 8           | 0.03    | 754.99                                   | 1.66                 | 0.04742                                   | 1.27                 | 8.52                        | 0.14          | 9.46                  | 0.24      |

|    |          |      |     |   |      |        |      |         |      |      |      |      |      |
|----|----------|------|-----|---|------|--------|------|---------|------|------|------|------|------|
| 10 | magmatic | 3586 | 93  | 5 | 0.03 | 748.21 | 1.54 | 0.04736 | 1.44 | 8.60 | 0.13 | 9.77 | 0.15 |
| 11 | magmatic | 6303 | 476 | 9 | 0.08 | 724.86 | 1.57 | 0.04740 | 0.99 | 8.87 | 0.14 | 9.03 | 0.16 |

**Zircon U-Pb: Qinghu zircon standard, Concordia age = 160.1 ± 2.0 Ma**

| Sample/<br>spot # | [U]<br>ppm | [Th]<br>ppm | Th/U<br>meas | <sup>207</sup> Pb<br><sup>235</sup> U | ±σ<br>% | <sup>206</sup> Pb<br><sup>238</sup> U | ±σ<br>% | ρ       | <sup>207</sup> Pb<br><sup>235</sup> U | ±σ  | <sup>206</sup> Pb<br><sup>238</sup> U | ±σ  |
|-------------------|------------|-------------|--------------|---------------------------------------|---------|---------------------------------------|---------|---------|---------------------------------------|-----|---------------------------------------|-----|
| QH@01             | 1152       | 448         | 0.388        | 0.17079                               | 1.59    | 0.0251                                | 1.50    | 0.94850 | 160.1                                 | 2.4 | 159.6                                 | 2.4 |
| QH@02             | 1620       | 741         | 0.457        | 0.17128                               | 1.57    | 0.0251                                | 1.50    | 0.95548 | 160.5                                 | 2.3 | 160.0                                 | 2.4 |
| QH@03             | 1369       | 729         | 0.532        | 0.16990                               | 1.59    | 0.0248                                | 1.51    | 0.94717 | 159.3                                 | 2.3 | 158.0                                 | 2.4 |
| QH@04             | 1229       | 504         | 0.410        | 0.17179                               | 1.86    | 0.0252                                | 1.54    | 0.82890 | 161.0                                 | 2.8 | 160.2                                 | 2.4 |
| QH@05             | 966        | 506         | 0.524        | 0.16886                               | 1.70    | 0.0245                                | 1.56    | 0.91276 | 158.4                                 | 2.5 | 156.3                                 | 2.4 |
| QH@06             | 1306       | 613         | 0.469        | 0.17662                               | 1.70    | 0.0260                                | 1.58    | 0.92768 | 165.1                                 | 2.6 | 165.2                                 | 2.6 |

**Zircon oxygen isotopes: Qinghu zircon standard, mean of δ<sup>18</sup>O = 5.51 ± 0.20 ‰ (2σ)**

|                   | QH@01 | QH@02 | QH@03 | QH@04 | QH@05 | QH@06 | QH@07 | QH@08 |
|-------------------|-------|-------|-------|-------|-------|-------|-------|-------|
| δ <sup>18</sup> O | 5.47  | 5.47  | 5.71  | 5.39  | 5.56  | 5.46  | 5.57  | 5.47  |
| 1σ                | 0.14  | 0.11  | 0.16  | 0.17  | 0.10  | 0.07  | 0.13  | 0.14  |

194 Note: Age<sup>207c</sup> is <sup>206</sup>Pb/<sup>238</sup>U age which common Pb was corrected by <sup>207</sup>Pb-correction method.

**Table S2** LA-ICP-MS U-Pb isotopic and SIMS O isotopic data of zircon xenocrysts in 6.0–2.3 Ma lavas.

| Spot                                                                         | Th (ppm) | U (ppm) | Th/U   | <sup>207</sup> Pb/ <sup>206</sup> Pb |         | <sup>207</sup> Pb/ <sup>235</sup> U |         | <sup>206</sup> Pb/ <sup>238</sup> U |         | <sup>207</sup> Pb/ <sup>206</sup> Pb (Ma) |       | <sup>207</sup> Pb/ <sup>235</sup> U (Ma) |      | <sup>206</sup> Pb/ <sup>238</sup> U (Ma) |      | δ18O  | 1σ   | Disc |
|------------------------------------------------------------------------------|----------|---------|--------|--------------------------------------|---------|-------------------------------------|---------|-------------------------------------|---------|-------------------------------------------|-------|------------------------------------------|------|------------------------------------------|------|-------|------|------|
|                                                                              |          |         |        | <sup>207</sup> Pb/ <sup>206</sup> Pb | 1σ      | <sup>207</sup> Pb/ <sup>235</sup> U | 1σ      | <sup>206</sup> Pb/ <sup>238</sup> U | 1σ      | Age                                       | 1σ    | Age                                      | 1σ   | Age                                      | 1σ   |       |      |      |
| <b>SIMS U-Pb isotopic data of zircon xenocrysts from 2.3 Ma dacite</b>       |          |         |        |                                      |         |                                     |         |                                     |         |                                           |       |                                          |      |                                          |      |       |      |      |
| 5123-2@01                                                                    | 3512     | 87      | 0.01   | 0.04719                              | 0.00129 | 0.02783                             | 0.00129 | 0.00428                             | 0.00016 | 59.0                                      | 63.9  | 27.9                                     | 1.3  | 27.5                                     | 1.0  | 9.81  | 0.09 | 1%   |
| 5123-2@02                                                                    | 4185     | 86      | 0.00   | 0.04761                              | 0.00145 | 0.02709                             | 0.00158 | 0.00413                             | 0.00021 | 79.8                                      | 70.9  | 27.1                                     | 1.6  | 26.5                                     | 1.3  | 9.42  | 0.10 | 2%   |
| 5123-2@03                                                                    | 9541     | 225     | 0.03   | 0.04662                              | 0.00046 | 0.03453                             | 0.00063 | 0.00537                             | 0.00008 | 29.8                                      | 23.7  | 34.5                                     | 0.6  | 34.5                                     | 0.5  | 8.75  | 0.17 | 0%   |
| 5123-2@05                                                                    | 331      | 199     | 0.52   | 0.05041                              | 0.00187 | 0.19601                             | 0.00785 | 0.02820                             | 0.00043 | 214.1                                     | 83.7  | 181.7                                    | 6.7  | 179.3                                    | 2.7  | 6.15  | 0.18 | 1%   |
| 5123-2@07                                                                    | 856      | 754     | 0.82   | 0.05069                              | 0.00093 | 0.22492                             | 0.00534 | 0.03218                             | 0.00049 | 226.8                                     | 41.8  | 206.0                                    | 4.4  | 204.2                                    | 3.0  | 6.74  | 0.13 | 1%   |
| 5123-2@08                                                                    | 240      | 223     | 0.01   | 0.06488                              | 0.00669 | 0.01255                             | 0.00136 | 0.00140                             | 0.00005 | 770.6                                     | 203.1 | 12.7                                     | 1.4  | 9.0                                      | 0.3  | 8.96  | 0.12 | 40%  |
| 5123-2@10                                                                    | 358      | 174     | 0.58   | 0.04966                              | 0.00102 | 0.23706                             | 0.00614 | 0.03463                             | 0.00055 | 178.9                                     | 47.0  | 216.0                                    | 5.0  | 219.4                                    | 3.4  | 7.59  | 0.18 | -2%  |
| 5123-2@11                                                                    | 208      | 171     | 0.01   | 0.06797                              | 0.00872 | 0.00899                             | 0.00120 | 0.00096                             | 0.00003 | 867.7                                     | 245.4 | 9.1                                      | 1.2  | 6.2                                      | 0.2  | 8.32  | 0.14 | 47%  |
| 5123-2@12                                                                    | 3806     | 344     | 0.05   | 0.04680                              | 0.00125 | 0.02245                             | 0.00071 | 0.00348                             | 0.00006 | 39.3                                      | 62.8  | 22.5                                     | 0.7  | 22.4                                     | 0.4  | 7.09  | 0.15 | 1%   |
| 5123-2@13                                                                    | 2868     | 480     | (0.03) | 0.04384                              | 0.00094 | 0.02012                             | 0.00053 | 0.00333                             | 0.00005 | -119.7                                    | 52.2  | 20.2                                     | 0.5  | 21.4                                     | 0.3  | 6.58  | 0.18 | -6%  |
| 5123-2@14                                                                    | 590      | 20      | 0.00   | 0.05505                              | 0.00445 | 0.01081                             | 0.00091 | 0.00142                             | 0.00003 | 414.2                                     | 171.3 | 10.9                                     | 0.9  | 9.2                                      | 0.2  | 11.66 | 0.20 | 19%  |
| 5123-2@15                                                                    | 603      | 557     | 0.81   | 0.15816                              | 0.00076 | 8.30794                             | 0.15137 | 0.38099                             | 0.00670 | 2436.0                                    | 8.1   | 2265.2                                   | 16.6 | 2080.9                                   | 31.3 | 10.87 | 0.18 | 17%  |
| 5123-2@16                                                                    | 855      | 383     | 0.49   | 0.05018                              | 0.00063 | 0.25010                             | 0.00492 | 0.03615                             | 0.00055 | 203.5                                     | 29.1  | 226.7                                    | 4.0  | 228.9                                    | 3.4  | 8.07  | 0.20 | -1%  |
| 5123-2@17                                                                    | 886      | 110     | 0.01   | 0.05171                              | 0.00227 | 0.01712                             | 0.00081 | 0.00240                             | 0.00004 | 272.5                                     | 97.6  | 17.2                                     | 0.8  | 15.5                                     | 0.3  | 6.53  | 0.14 | 11%  |
| 5123-2@18                                                                    | 2622     | 106     | 0.00   | 0.04956                              | 0.00159 | 0.01466                             | 0.00063 | 0.00215                             | 0.00006 | 174.5                                     | 73.0  | 14.8                                     | 0.6  | 13.8                                     | 0.4  | 8.42  | 0.20 | 7%   |
| 5123-2@19                                                                    | 2406     | 153     | 0.06   | 0.04607                              | 0.00156 | 0.01912                             | 0.00081 | 0.00301                             | 0.00008 | 0.0                                       | 81.2  | 19.2                                     | 0.8  | 19.4                                     | 0.5  | 8.16  | 0.12 | -1%  |
| 5123-2@20                                                                    | 1616     | 272     | 0.03   | 0.04861                              | 0.00129 | 0.02651                             | 0.00086 | 0.00395                             | 0.00007 | 129.1                                     | 61.4  | 26.6                                     | 0.9  | 25.4                                     | 0.5  | 6.91  | 0.13 | 4%   |
| 5123-2@21                                                                    | 350      | 143     | 0.02   | 0.05209                              | 0.00628 | 0.01295                             | 0.00162 | 0.00180                             | 0.00006 | 289.5                                     | 254.4 | 13.1                                     | 1.6  | 11.6                                     | 0.4  | 6.45  | 0.21 | 13%  |
| <b>LA-ICP-MS U-Pb isotopic data of zircon xenocrysts from ~6 Ma trachyte</b> |          |         |        |                                      |         |                                     |         |                                     |         |                                           |       |                                          |      |                                          |      |       |      |      |
| 13SW16-1 02                                                                  | 948      | 1490    | 0.64   | 0.06166                              | 0.00638 | 0.01471                             | 0.00130 | 0.00184                             | 0.00005 | 662                                       | 142   | 15                                       | 1    | 11.8                                     | 0.3  | 7.52  | 0.1  | 27%  |
| 13SW16-1 06                                                                  | 493      | 1608    | 0.31   | 0.05901                              | 0.00370 | 0.02132                             | 0.00127 | 0.00271                             | 0.00006 | 567                                       | 92    | 21                                       | 1    | 17.4                                     | 0.4  | 9.55  | 0.1  | 21%  |
| 13SW16-1 08                                                                  | 1718     | 2884    | 0.60   | 0.04606                              | 0.00721 | 0.01308                             | 0.00203 | 0.00206                             | 0.00004 | 1                                         | 281   | 13                                       | 2    | 13.3                                     | 0.2  | 9.87  | 0.1  | -2%  |
| 13SW16-1 09                                                                  | 2231     | 1493    | 1.49   | 0.04736                              | 0.00456 | 0.01068                             | 0.00087 | 0.00175                             | 0.00004 | 67                                        | 133   | 10.8                                     | 0.9  | 11.3                                     | 0.3  | 8.97  | 0.13 | -4%  |
| 13SW16-1 13                                                                  | 2216     | 2244    | 0.99   | 0.04733                              | 0.00608 | 0.01196                             | 0.00151 | 0.00183                             | 0.00004 | 66                                        | 256   | 12                                       | 2    | 11.8                                     | 0.3  | 8.84  | 0.1  | 2%   |
| 13SW16-1 14                                                                  | 504      | 4683    | 0.11   | 0.04682                              | 0.00182 | 0.02349                             | 0.00089 | 0.00364                             | 0.00005 | 40                                        | 57    | 23.6                                     | 0.9  | 23.4                                     | 0.3  | 8.78  | 0.09 | 1%   |

|             |      |      |      |         |         |         |         |         |         |      |     |      |     |      |     |      |      |      |
|-------------|------|------|------|---------|---------|---------|---------|---------|---------|------|-----|------|-----|------|-----|------|------|------|
| 13SW16-1 20 | 330  | 1275 | 0.26 | 0.05550 | 0.00482 | 0.01195 | 0.00086 | 0.00172 | 0.00004 | 433  | 115 | 12.1 | 0.9 | 11.1 | 0.3 | 7.92 | 0.09 | 9%   |
| 13SW20-1 03 | 724  | 1105 | 0.66 | 0.04605 | 0.00250 | 0.01074 | 0.00053 | 0.00169 | 0.00004 |      | 118 | 10.8 | 0.5 | 10.9 | 0.2 |      |      | -1%  |
| 13SW20-1 04 | 718  | 7500 | 0.10 | 0.05286 | 0.00252 | 0.01023 | 0.00046 | 0.00140 | 0.00002 | 323  | 111 | 10.3 | 0.5 | 9    | 0.1 |      |      | 14%  |
| 13SW20-1 07 | 2069 | 3079 | 0.67 | 0.04361 | 0.00231 | 0.01807 | 0.00098 | 0.00302 | 0.00006 | -91  | 81  | 18.2 | 1   | 19.5 | 0.4 |      |      | -7%  |
| 13SW20-1 09 | 504  | 661  | 0.76 | 0.05522 | 0.01238 | 0.01386 | 0.00305 | 0.00182 | 0.00008 | 421  | 436 | 14   | 3   | 11.7 | 0.5 |      |      | 20%  |
| 13SW20-1 11 | 728  | 4677 | 0.16 | 0.05296 | 0.00511 | 0.00822 | 0.00076 | 0.00113 | 0.00003 | 327  | 221 | 8.3  | 0.8 | 7.3  | 0.2 |      |      | 14%  |
| 13SW20-1 14 | 1844 | 6572 | 0.28 | 0.04849 | 0.00181 | 0.01212 | 0.00044 | 0.00181 | 0.00002 | 123  | 59  | 12.2 | 0.4 | 11.7 | 0.2 |      |      | 4%   |
| 13SW20-1 16 | 589  | 1689 | 0.35 | 0.05097 | 0.00462 | 0.01184 | 0.00107 | 0.00170 | 0.00004 | 240  | 162 | 12   | 1   | 11   | 0.3 |      |      | 9%   |
| 13SW20-1 17 | 463  | 918  | 0.50 | 0.05890 | 0.00777 | 0.01651 | 0.00213 | 0.00203 | 0.00006 | 564  | 299 | 17   | 2   | 13.1 | 0.4 |      |      | 30%  |
| 13SW20-1 18 | 238  | 3078 | 0.08 | 0.05073 | 0.00358 | 0.01624 | 0.00103 | 0.00237 | 0.00005 | 228  | 103 | 16   | 1   | 15.2 | 0.4 |      |      | 5%   |
| 13SW20-1 19 | 1040 | 1712 | 0.61 | 0.05813 | 0.00847 | 0.01090 | 0.00155 | 0.00136 | 0.00005 | 535  | 327 | 11   | 2   | 8.8  | 0.3 |      |      | 25%  |
| 13SW02-1 02 | 601  | 1101 | 0.55 | 0.05337 | 0.00452 | 0.01195 | 0.00093 | 0.00177 | 0.00004 | 345  | 130 | 12.1 | 0.9 | 11.4 | 0.3 | 9.91 | 0.08 | 6%   |
| 13SW02-1 07 | 431  | 1254 | 0.34 | 0.06226 | 0.00354 | 0.01681 | 0.00089 | 0.00206 | 0.00005 | 683  | 75  | 16.9 | 0.9 | 13.2 | 0.3 | 9.32 | 0.06 | 28%  |
| 13SW02-1 08 | 136  | 3542 | 0.04 | 0.04882 | 0.00230 | 0.01131 | 0.00052 | 0.00169 | 0.00003 | 139  | 72  | 11.4 | 0.5 | 10.9 | 0.2 |      |      | 5%   |
| 13SW02-1 11 | 345  | 2501 | 0.14 | 0.06108 | 0.00636 | 0.02098 | 0.00209 | 0.00249 | 0.00008 | 642  | 233 | 21   | 2   | 16   | 0.5 |      |      | 31%  |
| 13SW02-1 12 | 298  | 2240 | 0.13 | 0.04736 | 0.00313 | 0.01300 | 0.00085 | 0.00204 | 0.00004 | 67   | 107 | 13.1 | 0.9 | 13.2 | 0.3 |      |      | -1%  |
| 13SW02-1 13 | 255  | 3229 | 0.08 | 0.24988 | 0.03570 | 7.89246 | 2.91661 | 0.10445 | 0.04514 | 3184 | 324 | 2219 | 333 | 640  | 263 |      |      | 247% |
| 13SW02-1 14 | 1261 | 2077 | 0.61 | 0.06079 | 0.00354 | 0.01497 | 0.00080 | 0.00184 | 0.00004 | 632  | 81  | 15.1 | 0.8 | 11.9 | 0.2 |      |      | 27%  |
| 13SW02-1 16 | 791  | 4028 | 0.20 | 0.04415 | 0.00301 | 0.01207 | 0.00077 | 0.00201 | 0.00004 | -63  | 100 | 12.2 | 0.8 | 12.9 | 0.3 |      |      | -5%  |
| 13SW02-1 19 | 574  | 732  | 0.78 | 0.04605 | 0.00287 | 0.01370 | 0.00078 | 0.00216 | 0.00005 |      | 137 | 13.8 | 0.8 | 13.9 | 0.4 |      |      | -1%  |
| 13SW02-1 20 | 258  | 3501 | 0.07 | 0.05703 | 0.00555 | 0.02020 | 0.00181 | 0.00257 | 0.00010 | 493  | 221 | 20   | 2   | 16.5 | 0.6 |      |      | 21%  |
| 13SW47-1 01 | 1270 | 3783 | 0.34 | 0.04612 | 0.00249 | 0.01066 | 0.00055 | 0.00168 | 0.00003 | 4    | 117 | 10.8 | 0.6 | 10.8 | 0.2 |      |      | 0%   |
| 13SW47-1 02 | 682  | 765  | 0.89 | 0.04606 | 0.00470 | 0.00869 | 0.00081 | 0.00137 | 0.00006 | 1    | 209 | 8.8  | 0.8 | 8.8  | 0.4 |      |      | 0%   |
| 13SW47-1 04 | 768  | 913  | 0.84 | 0.05380 | 0.00499 | 0.01289 | 0.00106 | 0.00184 | 0.00005 | 363  | 136 | 13   | 1   | 11.8 | 0.3 |      |      | 10%  |
| 13SW47-1 10 | 1572 | 5679 | 0.28 | 0.05896 | 0.00387 | 0.01880 | 0.00122 | 0.00254 | 0.00016 | 566  | 63  | 19   | 1   | 16   | 1   |      |      | 19%  |
| 13SW47-1 11 | 657  | 2809 | 0.23 | 0.04858 | 0.00297 | 0.01098 | 0.00067 | 0.00168 | 0.00004 | 128  | 97  | 11.1 | 0.7 | 10.8 | 0.2 |      |      | 3%   |
| 13SW47-1 13 | 449  | 686  | 0.65 | 0.04606 | 0.00591 | 0.01028 | 0.00127 | 0.00162 | 0.00005 | 1    | 241 | 10   | 1   | 10.4 | 0.3 |      |      | -4%  |
| 13SW47-1 14 | 158  | 1544 | 0.10 | 0.05439 | 0.00373 | 0.42411 | 0.02428 | 0.05655 | 0.00214 | 387  | 159 | 359  | 17  | 355  | 13  |      |      | 1%   |
| 13SW47-1 17 | 1395 | 1689 | 0.83 | 0.04766 | 0.00306 | 0.00997 | 0.00060 | 0.00157 | 0.00005 | 82   | 82  | 10.1 | 0.6 | 10.1 | 0.3 |      |      | 0%   |
| 13SW49-1 04 | 1672 | 5338 | 0.31 | 0.05133 | 0.00258 | 0.01034 | 0.00054 | 0.00147 | 0.00003 | 256  | 77  | 10.4 | 0.5 | 9.5  | 0.2 |      |      | 9%   |



|              |        |       |      |         |         |         |         |         |         |      |     |      |     |      |     |      |      |      |
|--------------|--------|-------|------|---------|---------|---------|---------|---------|---------|------|-----|------|-----|------|-----|------|------|------|
| 13SW49-1 06  | 147    | 1101  | 0.13 | 0.06391 | 0.00520 | 0.07453 | 0.00468 | 0.00953 | 0.00056 | 739  | 59  | 73   | 4   | 61   | 4   |      |      | 20%  |
| 13SW49-1 11  | 91     | 763   | 0.12 | 0.05093 | 0.00202 | 0.06658 | 0.00318 | 0.00953 | 0.00027 | 238  | 60  | 65   | 3   | 61   | 2   | 8.15 | 0.09 | 7%   |
| 13SW49-1 17  | 516    | 840   | 0.61 | 0.07876 | 0.00984 | 0.02231 | 0.00223 | 0.00235 | 0.00010 | 1166 | 134 | 22   | 2   | 15.1 | 0.6 | 8.93 | 0.08 | 46%  |
| 13SW49-1 19  | 109073 | 26977 | 4.04 | 0.04605 | 0.00332 | 0.00836 | 0.00059 | 0.00132 | 0.00002 |      | 160 | 8.5  | 0.6 | 8.5  | 0.1 |      |      | 0%   |
| 14QW326-2-08 | 277    | 304   | 0.91 | 0.05428 | 0.01154 | 0.01620 | 0.00337 | 0.00216 | 0.00009 | 383  | 414 | 16   | 3   | 13.9 | 0.6 |      |      | 15%  |
| 14QW326-2-10 | 164    | 356   | 0.46 | 0.05624 | 0.00102 | 0.55488 | 0.00973 | 0.07151 | 0.00067 | 462  | 23  | 448  | 6   | 445  | 4   |      |      | 1%   |
| 14QW326-2-11 | 1451   | 1260  | 1.15 | 0.05203 | 0.00581 | 0.01212 | 0.00133 | 0.00169 | 0.00004 | 287  | 256 | 12   | 1   | 10.9 | 0.2 |      |      | 10%  |
| 14QW326-2-12 | 264    | 445   | 0.59 | 0.05164 | 0.00549 | 0.30874 | 0.03268 | 0.04336 | 0.00046 | 270  | 244 | 273  | 25  | 274  | 3   |      |      | 0%   |
| 14QW326-2-14 | 256    | 355   | 0.72 | 0.04961 | 0.00342 | 0.11667 | 0.00785 | 0.01706 | 0.00025 | 177  | 157 | 112  | 7   | 109  | 2   |      |      | 3%   |
| 14QW328-3-01 | 122    | 2428  | 0.05 | 0.04379 | 0.00114 | 0.01076 | 0.00026 | 0.00179 | 0.00002 | -81  | 36  | 10.9 | 0.3 | 11.5 | 0.1 |      |      | -5%  |
| 14QW328-3-02 | 258    | 534   | 0.48 | 0.04919 | 0.00071 | 0.20512 | 0.00399 | 0.03016 | 0.00043 | 157  | 22  | 189  | 3   | 192  | 3   | 6.57 | 0.06 | -2%  |
| 14QW328-3-03 | 350    | 146   | 2.40 | 0.05002 | 0.00605 | 0.04239 | 0.00503 | 0.00615 | 0.00014 | 196  | 266 | 42   | 5   | 39.5 | 0.9 | 7.38 | 0.09 | 6%   |
| 14QW328-3-04 | 49.5   | 72    | 0.69 | 0.05462 | 0.00147 | 0.42706 | 0.01064 | 0.05696 | 0.00063 | 397  | 36  | 361  | 8   | 357  | 4   | 6.06 | 0.1  | 1%   |
| 14QW328-3-05 | 62     | 119   | 0.52 | 0.06593 | 0.00961 | 0.01715 | 0.00241 | 0.00189 | 0.00007 | 804  | 324 | 17   | 2   | 12.2 | 0.5 | 9.13 | 0.05 | 39%  |
| 14QW328-3-06 | 189    | 145   | 1.30 | 0.05159 | 0.00818 | 0.01416 | 0.00220 | 0.00199 | 0.00006 | 267  | 324 | 14   | 2   | 12.8 | 0.4 | 9.83 | 0.09 | 9%   |
| 14QW328-3-07 | 135    | 142   | 0.95 | 0.04743 | 0.00180 | 0.11334 | 0.00402 | 0.01751 | 0.00021 | 71   | 58  | 109  | 4   | 112  | 1   |      |      | -3%  |
| 14QW328-3-08 | 30.9   | 55.7  | 0.55 | 0.04847 | 0.00189 | 0.27272 | 0.01096 | 0.04082 | 0.00056 | 122  | 68  | 245  | 9   | 258  | 3   |      |      | -5%  |
| 14QW328-3-09 | 99     | 86    | 1.16 | 0.04605 | 0.00662 | 0.15197 | 0.02175 | 0.02394 | 0.00032 |      | 262 | 144  | 19  | 152  | 2   |      |      | -5%  |
| 14QW328-3-11 | 27.9   | 14.7  | 1.90 | 0.15203 | 0.02154 | 0.12538 | 0.01357 | 0.00763 | 0.00047 | 2369 | 104 | 120  | 12  | 49   | 3   | 6.72 | 0.07 | 145% |
| 14QW328-3-13 | 173    | 212   | 0.82 | 0.05294 | 0.00129 | 0.25912 | 0.00689 | 0.03545 | 0.00045 | 326  | 37  | 234  | 6   | 225  | 3   |      |      | 4%   |
| 14QW328-3-14 | 35.3   | 94    | 0.37 | 0.06962 | 0.00307 | 0.73244 | 0.02989 | 0.07630 | 0.00127 | 917  | 93  | 558  | 18  | 474  | 8   |      |      | 18%  |
| 14QW328-3-18 | 497    | 2255  | 0.22 | 0.04822 | 0.00138 | 0.01900 | 0.00052 | 0.00286 | 0.00002 | 110  | 67  | 19.1 | 0.5 | 18.4 | 0.2 |      |      | 4%   |
| 14QW328-3-19 | 2079   | 43654 | 0.05 | 0.04682 | 0.00140 | 0.01082 | 0.00030 | 0.00167 | 0.00002 | 40   | 43  | 10.9 | 0.3 | 10.8 | 0.1 |      |      | 1%   |
| 14QW328-3-21 | 1827   | 2994  | 0.61 | 0.05023 | 0.00125 | 0.21256 | 0.00534 | 0.03060 | 0.00041 | 206  | 34  | 196  | 4   | 194  | 3   |      |      | 1%   |
| 14QW328-3-22 | 5870   | 6001  | 0.98 | 0.04638 | 0.00449 | 0.01347 | 0.00128 | 0.00211 | 0.00004 | 17   | 207 | 14   | 1   | 13.6 | 0.2 |      |      | 3%   |
| 14QW328-3-23 | 7569   | 5165  | 1.47 | 0.04897 | 0.00206 | 0.03853 | 0.00155 | 0.00572 | 0.00007 | 146  | 70  | 38   | 2   | 36.8 | 0.5 |      |      | 3%   |
| 14QW328-3-24 | 6659   | 5051  | 1.32 | 0.06260 | 0.00350 | 0.02419 | 0.00130 | 0.00288 | 0.00006 | 695  | 80  | 24   | 1   | 18.5 | 0.4 |      |      | 30%  |
| 14QW328-3-25 | 2893   | 3100  | 0.93 | 0.04606 | 0.00966 | 0.00986 | 0.00205 | 0.00155 | 0.00004 | 1    | 350 | 10   | 2   | 10   | 0.3 |      |      | 0%   |
| 14QW328-3-26 | 3265   | 4843  | 0.67 | 0.05571 | 0.00470 | 0.01216 | 0.00089 | 0.00169 | 0.00004 | 441  | 124 | 12.3 | 0.9 | 10.9 | 0.2 | 8.18 | 0.09 | 13%  |

| <b>Qinghu zircon standard for SIMS, Concordia age = 158.6 ± 2.1 Ma</b>      |        |       |      |                                      |         |                                     |         |                                     |         |                                           |      |                                          |      |                                          |      |        |
|-----------------------------------------------------------------------------|--------|-------|------|--------------------------------------|---------|-------------------------------------|---------|-------------------------------------|---------|-------------------------------------------|------|------------------------------------------|------|------------------------------------------|------|--------|
| Spot                                                                        | Th ppm | U ppm | Th/U | <sup>207</sup> Pb/ <sup>206</sup> Pb |         | <sup>207</sup> Pb/ <sup>235</sup> U |         | <sup>206</sup> Pb/ <sup>238</sup> U |         | <sup>207</sup> Pb/ <sup>206</sup> Pb (Ma) |      | <sup>207</sup> Pb/ <sup>235</sup> U (Ma) |      | <sup>206</sup> Pb/ <sup>238</sup> U (Ma) |      | Disc   |
|                                                                             |        |       |      | Ratio                                | 1σ %    | Ratio                               | 1σ %    | Ratio                               | 1σ %    | Age                                       | 1σ   | Age                                      | 1σ   | Age                                      | 1σ   |        |
| Qinghu@1                                                                    | 397    | 979   | 0.41 | 0.04917                              | 1.36    | 0.16803                             | 2.04    | 0.0248                              | 1.52    | 155.8                                     | 31.5 | 157.7                                    | 3.0  | 157.8                                    | 2.4  | -0.08% |
| Qinghu@2                                                                    | 700    | 1986  | 0.35 | 0.04921                              | 0.94    | 0.17212                             | 1.77    | 0.0254                              | 1.50    | 158.0                                     | 21.8 | 161.3                                    | 2.6  | 161.5                                    | 2.4  | -0.14% |
| Qinghu@3                                                                    | 309    | 666   | 0.46 | 0.04969                              | 1.63    | 0.17218                             | 2.22    | 0.0251                              | 1.51    | 180.4                                     | 37.5 | 161.3                                    | 3.3  | 160.0                                    | 2.4  | 0.81%  |
| Qinghu@4                                                                    | 813    | 1354  | 0.60 | 0.05050                              | 1.69    | 0.16908                             | 2.32    | 0.0245                              | 1.51    | 198.3                                     | 40.4 | 158.6                                    | 3.4  | 156.0                                    | 2.3  | 1.70%  |
| Qinghu@5                                                                    | 618    | 1112  | 0.56 | 0.04956                              | 1.70    | 0.17020                             | 2.35    | 0.0249                              | 1.63    | 174.2                                     | 39.1 | 159.6                                    | 3.5  | 158.6                                    | 2.6  | 0.62%  |
| <b>91500 zircon standard for LA-ICP-MS, Concordia age = 1062.4 ± 5.8 Ma</b> |        |       |      |                                      |         |                                     |         |                                     |         |                                           |      |                                          |      |                                          |      |        |
| Spot                                                                        | Th ppm | U ppm | Th/U | <sup>207</sup> Pb/ <sup>206</sup> Pb |         | <sup>207</sup> Pb/ <sup>235</sup> U |         | <sup>206</sup> Pb/ <sup>238</sup> U |         | <sup>207</sup> Pb/ <sup>206</sup> Pb (Ma) |      | <sup>207</sup> Pb/ <sup>235</sup> U (Ma) |      | <sup>206</sup> Pb/ <sup>238</sup> U (Ma) |      | Disc   |
|                                                                             |        |       |      | Ratio                                | 1σ      | Ratio                               | 1σ      | Ratio                               | 1σ      | Age                                       | 1σ   | Age                                      | 1σ   | Age                                      | 1σ   |        |
| 91500std                                                                    | 24.6   | 95.1  | 0.26 | 0.07561                              | 0.00242 | 1.86493                             | 0.05848 | 0.17876                             | 0.00275 | 1085                                      | 63.7 | 1069                                     | 20.7 | 1060                                     | 15.0 | 2.33%  |
| 91500std                                                                    | 19.8   | 81.2  | 0.24 | 0.07415                              | 0.00244 | 1.83547                             | 0.05873 | 0.17958                             | 0.00276 | 1056                                      | 66.7 | 1058                                     | 21.0 | 1065                                     | 15.1 | -0.85% |
| 91500std                                                                    | 33.1   | 118   | 0.28 | 0.07538                              | 0.00213 | 1.86087                             | 0.05383 | 0.17875                             | 0.00248 | 1080                                      | 62.0 | 1067                                     | 19.1 | 1060                                     | 13.5 | 1.84%  |
| 91500std                                                                    | 26.7   | 103   | 0.26 | 0.07438                              | 0.00220 | 1.83953                             | 0.05382 | 0.17959                             | 0.00258 | 1054                                      | 59.7 | 1060                                     | 19.2 | 1065                                     | 14.1 | -1.03% |
| 91500std                                                                    | 33.2   | 115   | 0.29 | 0.07527                              | 0.00215 | 1.86056                             | 0.05230 | 0.17876                             | 0.00254 | 1076                                      | 57.4 | 1067                                     | 18.6 | 1060                                     | 13.9 | 1.48%  |
| 91500std                                                                    | 35.0   | 128   | 0.27 | 0.07449                              | 0.00220 | 1.83984                             | 0.04947 | 0.17958                             | 0.00254 | 1055                                      | 63.9 | 1060                                     | 17.7 | 1065                                     | 13.9 | -0.94% |
| 91500std                                                                    | 17.3   | 75.5  | 0.23 | 0.07441                              | 0.00281 | 1.84695                             | 0.06847 | 0.17915                             | 0.00289 | 1054                                      | 75.9 | 1062                                     | 24.4 | 1062                                     | 15.8 | -0.81% |
| 91500std                                                                    | 23.7   | 87.2  | 0.27 | 0.07535                              | 0.00290 | 1.85345                             | 0.06613 | 0.17919                             | 0.00289 | 1080                                      | 77.8 | 1065                                     | 23.5 | 1063                                     | 15.8 | 1.61%  |
| 91500std                                                                    | 33.6   | 121   | 0.28 | 0.07571                              | 0.00227 | 1.87396                             | 0.05264 | 0.17925                             | 0.00255 | 1087                                      | 59.3 | 1072                                     | 18.6 | 1063                                     | 13.9 | 2.28%  |
| 91500std                                                                    | 28.8   | 105   | 0.27 | 0.07405                              | 0.00250 | 1.82644                             | 0.05793 | 0.17909                             | 0.00268 | 1043                                      | 68.5 | 1055                                     | 20.8 | 1062                                     | 14.7 | -1.83% |
| 91500std                                                                    | 34.2   | 121   | 0.28 | 0.07429                              | 0.00212 | 1.82953                             | 0.05164 | 0.17924                             | 0.00223 | 1050                                      | 57.4 | 1056                                     | 18.5 | 1063                                     | 12.2 | -1.21% |
| 91500std                                                                    | 34.7   | 120   | 0.29 | 0.07547                              | 0.00192 | 1.87087                             | 0.05007 | 0.17910                             | 0.00214 | 1081                                      | 51.1 | 1071                                     | 17.7 | 1062                                     | 11.7 | 1.80%  |
| 91500std                                                                    | 27.1   | 99    | 0.27 | 0.07319                              | 0.00207 | 1.80752                             | 0.05034 | 0.17921                             | 0.00261 | 1020                                      | 57.4 | 1048                                     | 18.2 | 1063                                     | 14.3 | -3.98% |
| 91500std                                                                    | 34.2   | 120   | 0.28 | 0.07474                              | 0.00196 | 1.84973                             | 0.05231 | 0.17904                             | 0.00248 | 1061                                      | 56.5 | 1063                                     | 18.6 | 1062                                     | 13.5 | -0.06% |
| 91500std                                                                    | 33.4   | 121   | 0.28 | 0.07353                              | 0.00211 | 1.81240                             | 0.05170 | 0.17907                             | 0.00273 | 1028                                      | 59.3 | 1050                                     | 18.7 | 1062                                     | 14.9 | -3.21% |
| 91500std                                                                    | 19.5   | 76.9  | 0.25 | 0.07537                              | 0.00238 | 1.85986                             | 0.05873 | 0.17922                             | 0.00291 | 1080                                      | 63.7 | 1067                                     | 20.9 | 1063                                     | 15.9 | 1.59%  |
| 91500std                                                                    | 22.1   | 84.3  | 0.26 | 0.07439                              | 0.00222 | 1.84054                             | 0.05691 | 0.17912                             | 0.00283 | 1054                                      | 65.7 | 1060                                     | 20.3 | 1062                                     | 15.5 | -0.80% |
| 91500std                                                                    | 32.3   | 114   | 0.28 | 0.07499                              | 0.00207 | 1.84996                             | 0.05018 | 0.17916                             | 0.00248 | 1133                                      | 55.6 | 1063                                     | 17.9 | 1062                                     | 13.5 | 6.68%  |

|          |      |      |      |         |         |         |         |         |         |      |      |      |      |      |      |        |
|----------|------|------|------|---------|---------|---------|---------|---------|---------|------|------|------|------|------|------|--------|
| 91500std | 21.4 | 83.9 | 0.25 | 0.07477 | 0.00229 | 1.85044 | 0.05771 | 0.17918 | 0.00269 | 1062 | 62.2 | 1064 | 20.6 | 1062 | 14.7 | -0.04% |
| 91500std | 27.9 | 102  | 0.27 | 0.07686 | 0.00233 | 1.89516 | 0.05712 | 0.17902 | 0.00292 | 1118 | 59.7 | 1079 | 20.0 | 1062 | 16.0 | 5.27%  |
| 91500std | 27.2 | 99   | 0.28 | 0.07290 | 0.00215 | 1.80524 | 0.05145 | 0.17932 | 0.00241 | 1013 | 60.0 | 1047 | 18.6 | 1063 | 13.2 | -4.73% |
| 91500std | 29.2 | 105  | 0.28 | 0.07379 | 0.00219 | 1.82374 | 0.05412 | 0.17918 | 0.00258 | 1035 | 59.3 | 1054 | 19.5 | 1063 | 14.1 | -2.57% |
| 91500std | 31.0 | 113  | 0.27 | 0.07597 | 0.00202 | 1.87666 | 0.04990 | 0.17916 | 0.00266 | 1094 | 53.2 | 1073 | 17.6 | 1062 | 14.6 | 3.02%  |
| 91500std | 29.4 | 104  | 0.28 | 0.07471 | 0.00222 | 1.84071 | 0.05239 | 0.17924 | 0.00282 | 1061 | 60.3 | 1060 | 18.7 | 1063 | 15.4 | -0.16% |
| 91500std | 28.1 | 97   | 0.29 | 0.07505 | 0.00223 | 1.85969 | 0.05580 | 0.17910 | 0.00267 | 1069 | 59.3 | 1067 | 19.8 | 1062 | 14.6 | 0.69%  |

196  
197  
198  
199

Note:

1. If  $^{206}\text{Pb}/^{238}\text{U}$  age <1000, Disc (Discordance) =  $(^{207}\text{Pb}/^{235}\text{U} \text{ age}) / (^{206}\text{Pb}/^{238}\text{U} \text{ age}) - 1$ ; If  $^{206}\text{Pb}/^{238}\text{U}$  age >1000, Disc =  $(^{207}\text{Pb}/^{206}\text{Pb} \text{ age}) / (^{206}\text{Pb}/^{238}\text{U} \text{ age}) - 1$ .
2. Results described in this study exclude analyses with >10% discordance.

**Table S3** In-situ LA-ICP-MS trace element (ppm) results for the zircon of granulite xenoliths entrained in 3.8 Ma trachytes.

| Spot#                                | Introductions | La     | Ce     | Pr     | Nd     | Sm     | Eu     | Gd     | Tb     | Dy     | Ho     | Er     | Tm     | Yb     | Lu     | Ti     | T/°C    |
|--------------------------------------|---------------|--------|--------|--------|--------|--------|--------|--------|--------|--------|--------|--------|--------|--------|--------|--------|---------|
| <b>11WL61-7: granulite xenolith</b>  |               |        |        |        |        |        |        |        |        |        |        |        |        |        |        |        |         |
| 1                                    | metamorphic   | 0.04   | 5.36   | 0.03   | 0.62   | 2.59   | 0.40   | 21.57  | 7.24   | 74.02  | 21.75  | 88.46  | 17.91  | 157.22 | 26.64  | 9.52   | 791.18  |
| 3                                    | metamorphic   | 0.32   | 6.75   | 0.11   | 1.24   | 4.15   | 0.43   | 29.06  | 9.88   | 102.16 | 31.14  | 130.66 | 26.41  | 230.01 | 41.48  | 8.81   | 783.30  |
| 4                                    | metamorphic   | 0.02   | 15.87  | 0.05   | 1.16   | 2.14   | 0.14   | 12.78  | 4.29   | 53.43  | 19.04  | 87.21  | 17.50  | 157.04 | 26.41  | 14.88  | 839.00  |
| 5                                    | metamorphic   | 0.02   | 6.70   | 0.03   | 0.66   | 3.77   | 0.45   | 28.68  | 9.46   | 96.94  | 29.25  | 119.77 | 24.61  | 216.37 | 37.57  | 6.14   | 748.06  |
| 6                                    | metamorphic   | 0.10   | 6.84   | 0.05   | 1.13   | 3.71   | 0.47   | 29.16  | 9.48   | 99.07  | 28.95  | 122.20 | 24.78  | 215.78 | 38.48  | 6.13   | 747.91  |
| 7                                    | core          | 0.38   | 29.89  | 0.21   | 2.80   | 5.40   | 2.25   | 30.41  | 9.57   | 117.47 | 43.62  | 205.69 | 46.05  | 435.99 | 80.58  | 7.71   | 770.00  |
| 8                                    | rim           | 0.10   | 6.84   | 0.05   | 1.13   | 3.71   | 0.47   | 29.16  | 9.48   | 99.07  | 28.95  | 122.20 | 24.78  | 215.78 | 38.48  | 6.13   | 747.91  |
| <b>11WL61-2: granulite xenolith</b>  |               |        |        |        |        |        |        |        |        |        |        |        |        |        |        |        |         |
| 1                                    | rim           | 3.48   | 8.49   | 0.80   | 3.86   | 1.98   | 0.16   | 12.58  | 4.64   | 48.25  | 13.93  | 48.63  | 6.90   | 44.13  | 7.41   | 7.10   | 761.95  |
| 2                                    | rim           | 0.10   | 1.51   | 0.07   | 0.58   | 1.56   | 0.17   | 13.00  | 4.65   | 44.44  | 11.28  | 33.98  | 5.26   | 36.03  | 5.20   | 5.92   | 744.63  |
| 3                                    | rim           | 5.44   | 9.16   | 0.98   | 4.89   | 4.95   | 0.32   | 27.46  | 7.41   | 56.19  | 10.33  | 24.96  | 3.06   | 18.88  | 2.89   | 6.68   | 756.08  |
| 5                                    | core          | 0.33   | 9.97   | 0.16   | 1.08   | 2.06   | 0.30   | 12.59  | 5.01   | 69.50  | 28.94  | 161.20 | 40.03  | 427.90 | 77.83  | 302.70 | 1322.67 |
| 6                                    | core          | 0.19   | 3.06   | 0.16   | 2.19   | 4.30   | 0.13   | 23.07  | 7.59   | 84.21  | 30.69  | 147.34 | 31.87  | 302.22 | 58.10  | 36.59  | 949.68  |
| 7                                    | rim           | 0.09   | 3.27   | 0.09   | 0.56   | 1.27   | 0.28   | 7.92   | 3.20   | 45.26  | 19.78  | 113.27 | 29.91  | 324.36 | 66.29  | 13.69  | 829.75  |
| 8                                    | metamorphic   | 0.62   | 2.08   | 0.21   | 1.09   | 2.37   | 0.25   | 17.89  | 4.97   | 36.31  | 6.90   | 18.40  | 2.60   | 17.78  | 3.11   | 20.66  | 876.97  |
| 9                                    | metamorphic   | 0.14   | 1.98   | 0.08   | 0.76   | 1.76   | 0.19   | 11.10  | 3.22   | 25.15  | 7.74   | 43.49  | 11.44  | 138.60 | 30.52  | 12.09  | 816.24  |
| <b>Standard: NIST610 and NIST612</b> |               |        |        |        |        |        |        |        |        |        |        |        |        |        |        |        |         |
| NIST610                              |               | 435.83 | 449.73 | 446.37 | 431.02 | 455.51 | 454.35 | 478.35 | 441.29 | 446.15 | 456.99 | 461.33 | 443.48 | 461.09 | 443.70 | 453.92 |         |
| NIST610                              |               | 441.96 | 459.26 | 456.50 | 450.14 | 467.80 | 462.75 | 487.97 | 456.35 | 455.00 | 461.96 | 469.58 | 450.35 | 466.48 | 453.19 | 470.28 |         |
| NIST610                              |               | 443.70 | 452.99 | 447.72 | 433.03 | 456.55 | 447.60 | 453.50 | 438.83 | 441.65 | 453.35 | 458.24 | 436.29 | 451.14 | 444.92 | 452.30 |         |
| NIST610                              |               | 443.65 | 454.10 | 449.50 | 426.63 | 454.65 | 448.66 | 447.88 | 436.55 | 435.27 | 449.07 | 451.64 | 435.59 | 450.56 | 436.17 | 451.02 |         |
| NIST610                              |               | 437.83 | 453.23 | 447.58 | 425.80 | 448.24 | 444.04 | 433.81 | 430.82 | 430.19 | 449.54 | 457.34 | 432.73 | 448.36 | 437.95 | 447.63 |         |
| NIST610                              |               | 433.55 | 446.18 | 441.27 | 420.14 | 441.50 | 436.26 | 425.81 | 428.25 | 425.12 | 436.37 | 443.54 | 424.14 | 436.29 | 426.67 | 441.65 |         |
| NIST610                              |               | 436.16 | 448.76 | 443.11 | 420.85 | 442.61 | 435.85 | 433.80 | 428.34 | 424.56 | 435.18 | 445.46 | 423.20 | 437.12 | 432.29 | 440.64 |         |
| NIST610                              |               | 442.43 | 456.59 | 448.40 | 427.97 | 445.54 | 437.51 | 430.55 | 431.34 | 430.27 | 441.82 | 447.18 | 427.07 | 443.90 | 434.19 | 452.70 |         |
| NIST612                              |               | 34.43  | 36.60  | 36.46  | 33.15  | 36.57  | 34.23  | 37.05  | 36.25  | 34.61  | 36.30  | 36.71  | 35.70  | 37.21  | 35.66  | 45.71  |         |

|         |       |       |       |       |       |       |       |       |       |       |       |       |       |       |       |
|---------|-------|-------|-------|-------|-------|-------|-------|-------|-------|-------|-------|-------|-------|-------|-------|
| NIST612 | 35.00 | 37.18 | 36.99 | 34.71 | 35.78 | 34.12 | 37.42 | 35.11 | 34.72 | 36.38 | 36.46 | 35.33 | 38.13 | 35.28 | 46.41 |
| NIST612 | 34.58 | 36.75 | 35.99 | 33.22 | 35.59 | 33.65 | 34.41 | 34.45 | 34.01 | 35.21 | 36.20 | 34.31 | 35.59 | 35.00 | 41.78 |
| NIST612 | 35.69 | 37.63 | 36.89 | 33.81 | 36.07 | 34.04 | 34.25 | 34.68 | 33.64 | 35.84 | 36.03 | 34.36 | 36.60 | 35.14 | 37.10 |
| NIST612 | 35.11 | 37.66 | 36.75 | 34.51 | 35.10 | 33.68 | 34.35 | 34.97 | 32.72 | 35.84 | 36.34 | 34.23 | 35.46 | 34.32 | 39.53 |
| NIST612 | 35.24 | 36.94 | 36.79 | 33.55 | 36.33 | 34.06 | 36.44 | 34.88 | 33.80 | 36.16 | 36.46 | 34.58 | 36.93 | 34.54 | 36.87 |
| NIST612 | 35.72 | 37.24 | 37.03 | 34.86 | 37.01 | 34.30 | 34.79 | 35.84 | 34.37 | 36.23 | 36.95 | 34.95 | 35.51 | 34.97 | 38.44 |
| NIST612 | 35.30 | 37.15 | 36.24 | 34.21 | 36.04 | 34.67 | 35.93 | 35.42 | 33.96 | 35.95 | 36.36 | 35.15 | 36.38 | 34.81 | 35.29 |

201 Note:

202 1. The in-situ trace element analysis spot correspond to those of SIMS zircon U-Pb dating (Table S1).

203 2. In order to obtain high quality data, the zircon grains were polished slightly prior to the test, and some smaller grains (e.g., 11WL61-7@2, 11WL61-2@4) were  
204 accidentally polished out without obtaining trace data.

205 3. Temperatures calculated by Ti-in-zircon geothermometer assuming  $\alpha_{\text{SiO}_2} = 1$ ,  $\alpha_{\text{TiO}_2} = 0.6$  (Ferry and Watson, 2007; Watson et al., 2006)

206 4. Ti content of 11WL61-2@5 is very high, up to 302.70 ppm, and most probably as a result of inclusions in the zircons.

207 **Table S4** Representative analyses of minerals of granulite xenoliths entrained in 3.8 Ma trachytes.

| Mineral                        | 11WL61-7 (mafic granulite) |        |       |        |        |       |       |       |       |       |       |       | 11WL61-2 (mafic granulite) |        |        |        |       |       |       |
|--------------------------------|----------------------------|--------|-------|--------|--------|-------|-------|-------|-------|-------|-------|-------|----------------------------|--------|--------|--------|-------|-------|-------|
|                                | Pl                         | Pl     | Opx   | Opx    | Cpx    | Cpx   | Bt    | Amp   | Ilm   | Tmt   | Ilm   | Tmt   | Pl                         | Pl     | Opx    | Opx    | Cpx   | Bt    | Ilm   |
| SiO <sub>2</sub>               | 54.35                      | 53.67  | 51.76 | 51.95  | 52.36  | 51.95 | 36.71 | 42.07 | 0.1   | 0.44  | 0.02  | 0.55  | 56.34                      | 54.04  | 51.45  | 52.08  | 50.41 | 36.72 | 0.04  |
| TiO <sub>2</sub>               | \                          | \      | 0.05  | 0.12   | 0.25   | 0.19  | 4.77  | 2.36  | 46.82 | 12.65 | 46.8  | 12.68 | 0.01                       | \      | 0.23   | 0.14   | 0.3   | 6.87  | 49.32 |
| Al <sub>2</sub> O <sub>3</sub> | 27.97                      | 28.54  | 3.32  | 3.23   | 2.53   | 2.76  | 14.8  | 12.07 | 0.6   | 9.1   | 0.24  | 5.76  | 26.81                      | 28.98  | 5      | 3.51   | 2.82  | 13.93 | 0.18  |
| FeO                            | 0.37                       | 0.53   | 22.29 | 22.84  | 10.93  | 10.77 | 13.01 | 14.84 | 46.65 | 70.45 | 49.1  | 71.98 | 0.08                       | 0.44   | 19.95  | 20.81  | 10.76 | 13.14 | 47.25 |
| MnO                            | 0.04                       | 0.02   | 0.09  | 0.09   | 0.04   | 0.03  | 0.05  | 0.10  | 0.34  | 0.42  | 0.53  | 0.33  | 0.01                       | 0.01   | 0.91   | 1.01   | 0.31  | \     | 1.12  |
| MgO                            | 0.04                       | 0.03   | 21.45 | 21.97  | 13.42  | 13.20 | 15.33 | 10.61 | 3.99  | 4.65  | 1.35  | 4.42  | 0.01                       | 0.06   | 22.29  | 22.09  | 13.28 | 14.69 | 1.19  |
| CaO                            | 11.56                      | 12.75  | 0.39  | 0.38   | 20.60  | 20.32 | 0.08  | 11.82 | 0.07  | 0.02  | \     | 0.09  | 9.37                       | 12.08  | 0.81   | 0.74   | 21.02 | 0.16  | \     |
| Na <sub>2</sub> O              | 4.38                       | 4.26   | 0.13  | 0.02   | 0.48   | 0.55  | 0.63  | 1.72  | 0.07  | 0.04  | 0.28  | 0.08  | 6.28                       | 4.3    | 0.07   | 0.12   | 0.73  | 1.22  | 0.1   |
| K <sub>2</sub> O               | 0.67                       | 0.49   | \     | \      | 0.01   | 0.01  | 9.96  | 1.67  | \     | 0.07  | 0.01  | 0.16  | 0.95                       | 0.77   | \      | 0.01   | \     | 8.35  | 0.02  |
| F                              | \                          | \      | \     | \      | \      | \     | \     | \     | \     | \     | \     | \     | 0.01                       | \      | \      | \      | \     | 2.56  | \     |
| Cl                             | 0.01                       | \      | 0.01  | \      | 0.00   | 0.01  | 0.01  | 0.03  | \     | \     | 0.03  | \     | 0.03                       | 0.01   | \      | 0.01   | \     | 0.20  | 0.02  |
| Total                          | 99.39                      | 100.28 | 99.48 | 100.59 | 100.61 | 99.78 | 95.34 | 97.27 | 98.64 | 97.84 | 98.35 | 96.04 | 99.9                       | 100.68 | 100.71 | 100.51 | 99.63 | 97.83 | 99.23 |
| Oxygens                        | 8                          | 8      | 6     | 6      | 6      | 6     | 11    | 23    | 3     | 4     | 3     | 4     | 8                          | 8      | 6      | 6      | 6     | 11    | 3     |
| Si                             | 2.482                      | 2.441  | 1.932 | 1.922  | 1.948  | 1.947 | 2.736 | 6.335 | 0.003 | 0.017 | 0.001 | 0.023 | 2.547                      | 2.437  | 1.886  | 1.921  | 1.908 | 2.654 | 0.001 |
| Ti                             | \                          | \      | 0.001 | 0.003  | 0.007  | 0.005 | 0.268 | 0.267 | 0.902 | 0.372 | 0.921 | 0.391 | \                          | \      | 0.006  | 0.004  | 0.009 | 0.373 | 0.952 |
| Al                             | 1.505                      | 1.530  | 0.146 | 0.141  | 0.111  | 0.122 | 1.3   | 2.142 | 0.018 | 0.42  | 0.007 | 0.278 | 1.429                      | 1.541  | 0.216  | 0.153  | 0.126 | 1.187 | 0.005 |
| Fe <sup>3+</sup>               | \                          | \      | 0.000 | 0.000  | 0.021  | 0.020 | 0.135 | 0.265 | 0.257 | 1.085 | 0.242 | 1.208 | \                          | \      | 0.008  | 0.01   | 0.14  | 0.455 | 0.132 |
| Fe <sup>2+</sup>               | \                          | \      | 0.698 | 0.706  | 0.318  | 0.317 | 0.675 | 1.603 | 0.743 | 1.219 | 0.833 | 1.256 | \                          | \      | 0.603  | 0.631  | 0.196 | 0.339 | 0.882 |
| Mn                             | \                          | \      | 0.003 | 0.003  | 0.001  | 0.001 | 0.003 | 0.012 | 0.007 | 0.014 | 0.012 | 0.012 | \                          | \      | 0.028  | 0.031  | 0.01  | 0.000 | 0.024 |
| Mg                             | \                          | \      | 1.181 | 1.212  | 0.744  | 0.737 | 1.703 | 2.381 | 0.152 | 0.271 | 0.053 | 0.27  | \                          | \      | 1.218  | 1.214  | 0.749 | 1.583 | 0.046 |
| Ca                             | 0.566                      | 0.602  | 0.016 | 0.015  | 0.821  | 0.816 | 0.006 | 1.906 | 0.002 | 0.001 | \     | 0.004 | 0.454                      | 0.584  | 0.032  | 0.029  | 0.852 | 0.012 |       |
| Na                             | 0.388                      | 0.386  | 0.010 | 0.001  | 0.034  | 0.040 | 0.091 | 0.503 | 0.003 | 0.003 | 0.014 | 0.006 | 0.551                      | 0.376  | 0.005  | 0.009  | 0.053 | 0.171 | 0.005 |
| K                              | 0.039                      | 0.028  | 0.000 | 0.000  | 0.000  | 0.001 | 0.947 | 0.32  | \     | 0.004 | \     | 0.008 | 0.055                      | 0.044  | \      | \      | \     | 0.770 | 0.001 |
| An (Pl)                        | 57.0                       | 59.2   | \     | \      | \      | \     | \     | \     | \     | \     | \     | \     | 42.8                       | 58.2   | \      | \      | \     | \     | \     |
| Mg#(Opx)                       | \                          | \      | 62.8  | 63.2   | \      | \     | \     | \     | \     | \     | \     | \     | \                          | \      | 66.6   | 65.4   | 69.0  | 66.6  | \     |

Titanomagnetite-Ilmenite thermometer (Sauerzapf et al., 2008): 829–884 °C

Note: An = Ca / (Ca + Na + K) × 100%; Mg# (Opx) = Mg / (Mg + Fe<sup>2+</sup>) × 100%

208  
209

210 **Table S5** Representative analyses of minerals of amphibolite facies xenoliths contained in 28 Myr syenites porphyries.

| mineral                                          | 11GM01-20 (garnet amphibolite) |        |       |        |       | 11GM01-10 (garnet amphibolite) |       |       |        |       |       | 11GM01-21 (amphibolite) |        |       |
|--------------------------------------------------|--------------------------------|--------|-------|--------|-------|--------------------------------|-------|-------|--------|-------|-------|-------------------------|--------|-------|
|                                                  | grt                            | cpx    | amp   | pl     | pl    | cpx                            | pl    | amp   | grt    | cpx   | bt    | amp                     | pl     | bt    |
| SiO <sub>2</sub>                                 | 38.23                          | 51.45  | 42.33 | 53.02  | 51.59 | 51.32                          | 52.94 | 42.98 | 38.32  | 51.37 | 36.04 | 43.13                   | 59.32  | 36.36 |
| TiO <sub>2</sub>                                 | 0.1                            | 0.19   | 2.01  | \      | \     | 0.16                           | \     | 2.19  | 0.02   | 0.12  | 3.74  | 2.27                    | 0.03   | 5.12  |
| Al <sub>2</sub> O <sub>3</sub>                   | 21.52                          | 1.98   | 12.14 | 29.17  | 29.76 | 1.66                           | 28.5  | 12.57 | 21.71  | 1.76  | 16.81 | 12.24                   | 25.37  | 14.6  |
| FeO                                              | 25.68                          | 10.18  | 14.88 | 0.11   | 0.03  | 9.58                           | 0.13  | 13.16 | 26.74  | 9.43  | 16.68 | 14.46                   | \      | 18.01 |
| MnO                                              | 0.86                           | 0.22   | 0.09  | 0.04   | \     | 0.16                           | 0.03  | 0.1   | 1.4    | 0.12  | 0.14  | 0.07                    | \      | 0.12  |
| MgO                                              | 6.33                           | 12.34  | 10.67 | 0.01   | 0.01  | 12.6                           | \     | 10.97 | 6.32   | 12.43 | 12.61 | 10.17                   | 0.01   | 12.14 |
| CaO                                              | 6.85                           | 23.17  | 12.08 | 12.31  | 13.48 | 24                             | 11.89 | 12.33 | 6.3    | 23.89 | \     | 12.29                   | 7.13   | \     |
| Na <sub>2</sub> O                                | 0.03                           | 0.73   | 1.68  | 5.13   | 4.43  | 0.73                           | 5.23  | 1.62  | \      | 0.7   | 0.61  | 1.89                    | 7.98   | 0.65  |
| K <sub>2</sub> O                                 | 0.01                           | 0.09   | 1.6   | 0.29   | 0.24  | \                              | 0.32  | 1.61  | \      | 0.03  | 9.3   | 1.57                    | 0.28   | 8.99  |
| F                                                | \                              | \      | \     | 0.01   | \     | \                              | \     | \     | \      | \     | \     | \                       | b.d.   | \     |
| Cl                                               | \                              | 0.01   | 0.02  | \      | 0.01  | 0.01                           | \     | 0.07  | 0.01   | 0.01  | 0.12  | 0.08                    | 0.01   | 0.02  |
| Total                                            | 99.61                          | 100.36 | 97.51 | 100.08 | 99.56 | 100.22                         | 99.04 | 97.61 | 100.82 | 99.86 | 96.05 | 98.17                   | 100.11 | 96    |
| Oxygens                                          | 12                             | 6      | 23    | 8      | 8     | 6                              | 8     | 23    | 12     | 6     | 11    | 23                      | 8      | 11    |
| Si                                               | 2.982                          | 1.937  | 6.356 | 2.409  | 2.362 | 1.935                          | 2.428 | 6.386 | 2.966  | 1.941 | 2.698 | 6.413                   | 2.65   | 2.742 |
| Ti                                               | 0.006                          | 0.005  | 0.227 | \      | \     | 0.004                          | \     | 0.245 | 0.001  | 0.003 | 0.211 | 0.254                   | 0.001  | 0.291 |
| Al                                               | 1.978                          | 0.088  | 2.147 | 1.562  | 1.606 | 0.074                          | 1.541 | 2.202 | 1.981  | 0.078 | 1.483 | 2.144                   | 1.335  | 1.298 |
| Fe <sup>3+</sup>                                 | 0.029                          | 0.126  | 0.261 | \      | \     | 0.151                          |       | 0.354 | 0.041  | 0.128 | 0.17  | 0.327                   | \      | 0.203 |
| Fe <sup>2+</sup>                                 | 1.646                          | 0.191  | 1.608 | 0.004  | 0.001 | 0.148                          | 0.005 | 1.281 | 1.689  | 0.167 | 0.875 | 1.471                   | \      | 0.933 |
| Mn                                               | 0.057                          | 0.007  | 0.012 | 0.002  | \     | 0.005                          | 0.001 | 0.013 | 0.092  | 0.004 | 0.009 | 0.008                   | \      | 0.008 |
| Mg                                               | 0.736                          | 0.693  | 2.389 | \      | \     | 0.708                          | \     | 2.43  | 0.73   | 0.7   | 1.408 | 2.255                   | \      | 1.365 |
| Ca                                               | 0.573                          | 0.935  | 1.943 | 0.599  | 0.661 | 0.969                          | 0.584 | 1.963 | 0.523  | 0.967 | \     | 1.957                   | 0.341  | \     |
| Na                                               | 0.005                          | 0.053  | 0.489 | 0.452  | 0.393 | 0.054                          | 0.465 | 0.468 | \      | 0.051 | 0.089 | 0.545                   | 0.691  | 0.094 |
| K                                                | \                              | 0.004  | 0.307 | 0.017  | 0.014 | \                              | 0.019 | 0.305 | \      | 0.001 | 0.889 | 0.299                   | 0.016  | 0.865 |
| Grt-Cpx Thermometer<br>(Ravna, 2000)             | <b>664 °C</b>                  |        |       |        |       | <b>620 °C</b>                  |       |       |        |       |       | \                       |        |       |
| Amp-Pl Thermometer<br>(Holland and Blundy, 1994) | <b>730 °C</b>                  |        |       |        |       | <b>640 °C</b>                  |       |       |        |       |       | <b>627 °C</b>           |        |       |

|                                                                          |                |               |   |
|--------------------------------------------------------------------------|----------------|---------------|---|
| Grt-Cpx-Pl-Qtz Barometer<br>( <a href="#">Eckert et al., 1991</a> )      | <b>10 kbar</b> | <b>9 kbar</b> | \ |
| Grt-Cpx-Pl-Qtz Barometer<br>( <a href="#">Newton and Perkins, 1982</a> ) | <b>8 kbar</b>  | <b>7 kbar</b> | \ |



211 **References**

- 212 Andersen, T., 2002, Correction of common lead in U–Pb analyses that do not report 204Pb:  
213 *Chemical Geology*, v. 192, p. 59–79.
- 214 Eckert, J.O., Newton, R.C., Kleppa, O.J., 1991, The H of reaction and recalibration of  
215 garnet–pyroxene–plagioclase–quartz geobarometers in the CMAS system by solution  
216 calorimetry: *American Mineralogist*, v. 76, n. 1–2, p. 148–160.
- 217 Ferry J.M., Watson E.B., 2007, New thermodynamic models and revised calibrations for the  
218 Ti-in-zircon and Zr-in-rutile thermometers: *Contrib Mineral Petrol*, v. 154, p. 429–437.
- 219 Green, E. C. R., White, R. W., Diener, J. F. A., Powell, R., Holland, T. J. B., & Palin, R. M., 2016,  
220 Activity–composition relations for the calculation of partial melting equilibria for metabasic  
221 rocks: *Journal of Metamorphic Geology*, v. 34, p. 845–869.
- 222 Hacker, B. R., and Abers G. A., Subduction Factory 3, 2004, An Excel worksheet and macro for  
223 calculating the densities, seismic wave speeds, and H<sub>2</sub>O contents of minerals and rocks at  
224 pressure and temperature: *Geochemistry Geophysics Geosystems*, v. 5, Q01005.
- 225 Holland, T., & Blundy, J., 1994, Non-ideal interactions in calcic amphiboles and their bearing on  
226 amphibole-plagioclase thermometry: *Contributions to mineralogy and petrology*, v. 116, n. 4,  
227 p. 433–447.
- 228 Holland, T.J.B. & Powell, R., 2003, Activity–composition relations for phases in petrological  
229 calculations: an asymmetric multicomponent formulation: *Contributions to Mineralogy and  
230 Petrology*, v. 145, p. 492–501.
- 231 Holland, T.J.B. & Powell, R., 2011, An improved and extended internally consistent  
232 thermodynamic dataset for phases of petrological interest, involving a new equation of state  
233 for solids: *Journal of Metamorphic Geology*, v. 29, p. 333–383.
- 234 Jackson, S.E., Pearson, N.J., Belousova, E., Griffin, W.L., 2004, The application of laser  
235 ablation-inductively coupled plasma-mass spectrometry (LA-ICP-MS) to in situ U– Pb  
236 geochronology: *Chemical Geology*, v. 211, p. 47–69.
- 237 Li, X. H., Long, W. G., Li, Q. L., Liu, Y., Zheng, Y. F., Yang, Y. H., Chamberlain, K. R., Wan, D.  
238 F., Guo, C. H., Wang, X. C., and Tao, H., 2010, Penglai Zircon Megacrysts: A Potential New  
239 Working Reference Material for Microbeam Determination of Hf-O Isotopes and U-Pb Age:  
240 *Geostandards and Geoanalytical Research*, v. 34, no. 2, p. 117–134.
- 241 Li, X., Tang, G., Gong, B., Yang, Y., Hou, K., Hu, Z., Li, Q., Liu, Y., and Li, W., 2013, Qinghu  
242 zircon: A working reference for microbeam analysis of U-Pb age and Hf and O isotopes:  
243 *Chinese Science Bulletin*, v. 58, p. 4647–4654.
- 244 Li, X.H., Liu, Y., Li, Q.L., Guo, C.H., and Chamberlain, K.R., 2009, Precise determination of  
245 Phanerozoic zircon Pb/Pb age by multicollector SIMS without external standardization:  
246 *Geochemistry, Geophysics, Geosystems*, v. 10, Q04010.
- 247 Ludwig, K. R., 2003, User’s Manual for Isoplot/Ex Version 3.00. In: Ludwig, K. R., ed., A  
248 Geochronological Toolkit for Microsoft Excel. Berkeley Geochronology Center Special

249 Publication: Berkeley, p. 41–70.

250 Newton, R.C., Perkins, D., 1982, Thermodynamic calibration of geobarometers based on the  
 251 assemblages garnet–plagioclase–orthopyroxene (clinopyroxene) –quartz. *American*  
 252 *Mineralogist*: v. 67, no. 2, p. 203–222.

253 Ou, Q., 2017, Middle Eocene-Late Miocene (42-6 Ma) igneous rocks in  
 254 Gemuchaka-Chibuzhangcuo area, Qiangtang Block (central Tibet Plateau): Petrogenesis and  
 255 insights for deep geodynamics, [Ph.D. thesis]: University of Chinese Academy of Sciences,  
 256 380 p (in Chinese with English abstract).

257 Palin, R.M., White, R.W., Green, E.C.R., Diener, J.F.A., Powell, R., Holland, T.J.B., 2016,  
 258 Highgrade metamorphism and partial melting of basic and intermediate rocks: *J. Metamorph.*  
 259 *Geol.*, v. 34, p. 871–892.

260 Powell, R. & Holland, T.J.B., 1988, An internally consistent dataset with uncertainties and  
 261 correlations: 3. Applications to geobarometry, worked examples and a computer program:  
 262 *Journal of Metamorphic Geology*, v. 6, p. 173–204.

263 Ravna, E.K., 2000, Distribution of Fe<sup>2+</sup> and Mg between coexisting garnet and hornblende in  
 264 synthetic and natural systems: an empirical calibration of the garnet–hornblende Fe–Mg  
 265 geothermometer: *Lithos*, v. 53, no. 3–4, p. 265–277.

266 Sauerzapf, U., Lattard, D., Burchard, M., Engelmann, R., 2008, The titanomagnetite-ilmenite  
 267 equilibrium: new experimental data and thermo-oxybarometric application to the  
 268 crystallization of basic to intermediate rocks: *J. Petrol.*, v. 49, 1161e1185

269 Sláma, J., Košler, J., Condon, D. J., Crowley, J. L., Gerdes, A., Hanchar, J. M., Horstwood, M. S.  
 270 A., Morris, G. A., Nasdala, L., Norberg, N., Schaltegger, U., Schoene, B., Tubrett, M. N.,  
 271 Whitehouse, M. J., 2008, Plešovice zircon – a new natural reference material for U-Pb and Hf  
 272 isotopic microanalysis: *Chemical Geology*, v. 249, p. 1–35.

273 Sun, S.S., McDonough, W.F., 1989, Chemical and isotopic systematics of oceanic basalts:  
 274 implications for mantle composition and processes: Geological Society, London, Special  
 275 Publications, p. 313–345.

276 Watson, E.B., Wark, D.A., Thomas, J., 2006, Crystallization thermometers for zircon and rutile:  
 277 *Contrib. Mineral. Petrol.*, v. 151, n. 4, p. 413–433.

278 White, R.W., Powell, R. & Clarke, G.L., 2002, The interpretation of reaction textures in Fe-rich  
 279 metapelitic granulites of the Musgrave Block, central Australia: constraints from mineral  
 280 equilibria calculations in the system K<sub>2</sub>O–FeO–MgO–Al<sub>2</sub>O<sub>3</sub>–SiO<sub>2</sub>–H<sub>2</sub>O–TiO<sub>2</sub>–Fe<sub>2</sub>O<sub>3</sub>: *Journal*  
 281 *of Metamorphic Geology*, v. 20, p. 41–55.

282 White, R.W., Powell, R. & Johnson, T.E., 2014, The effect of Mn on mineral stability in  
 283 metapelites revisited: new a–x relations for manganese-bearing minerals: *Journal of*  
 284 *Metamorphic Geology*, v. 32, p. 809–828.

285 White, R.W., Powell, R., Holland, T.J.B. & Worley, B.A., 2000, The effect of TiO<sub>2</sub> and Fe<sub>2</sub>O<sub>3</sub> on  
 286 metapelitic assemblages at greenschist and amphibolite facies conditions: mineral equilibria

287 calculations in the system  $K_2O-FeO-MgO-Al_2O_3-SiO_2-H_2O-TiO_2-Fe_2O_3$ : Journal of  
288 Metamorphic Geology, v. 18, p. 497–511.

289 White, R.W., Powell, R., Holland, T.J.B., Johnson, T.E. & Green, E.C.R., 2014, New mineral  
290 activity–composition relations for thermodynamic calculations in metapelitic systems:  
291 Journal of Metamorphic Geology, v. 32, p. 261–286.

292 Wiedenbeck, M., Allé, P., Corfu, F., Griffin, W.L., Meier, M., Oberli, F., von Quadt, A., Roddick,  
293 J.C., Spiegel, W., 1995, Three natural zircon standards for U–Th–Pb, Lu–Hf, trace element  
294 and REE analyses: Geostandards and Geoanalytical Research, v. 19, p. 1–23.

295 Zhang, L., Ren, Z.-Y., Xia, X.-P., Yang, Q., Hong, L.-B., & Wu, D., 2019, In situ determination of  
296 trace elements in melt inclusions using laser ablation-inductively coupled plasma-sector  
297 field-mass spectrometry: Rapid Communications in Mass Spectrometry, v. 33, p. 361– 370.
